# Supplementary material for: Synthesis and antiproliferative effect of the proposed stereoisomer of the marine sponge metabolite halisphingosine A
Source: Royal Society of Chemistry journal article supplement (doi:10.1039/d0ob01786h), 2020-01-01
Supplement: d0ob01786h1.pdf [file d0ob01786h1.pdf]

## Supporting Information

### Synthesis and antiproliferative effect of the proposed stereoisomer of the marine sponge metabolite halisphingosine A

Alexander Bär, Sofia I. Bär and Rainer Schobert\*

Department of Chemistry, University Bayreuth, Universitaetsstrasse 30, 95440 Bayreuth,  
Germany

Fax: +49(0)921 552671

E-mail: Rainer.Schobert@uni-bayreuth.de

| <b>Table of content</b>                                                 | <b>Page</b> |
|-------------------------------------------------------------------------|-------------|
| Comparison of NMR data of synthetic and isolated <b>1</b> and <b>15</b> | S2          |
| Synthesis and analysis of Mosher amides and esters <b>S1-S4</b>         | S3          |
| NMR spectra and chromatograms                                           | S7          |
| Cell culture conditions and MTT-assay                                   | S30         |
| References                                                              | S31         |

Table 1. Comparison of  $^{13}\text{C}$  and  $^1\text{H}$  NMR shifts of isolated and synthetic Halisphingosine A (**1**) and *N*-Boc-Halisphingosine A (**15**)

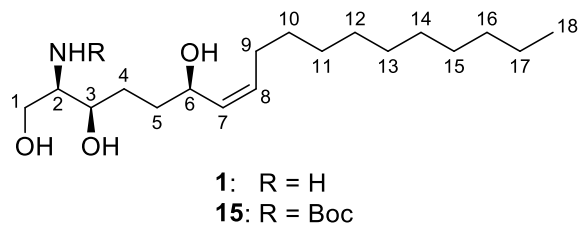

|                      | isolated <b>1</b> (lit. <sup>1</sup> ) in CD <sub>3</sub> OD |                                            | synthetic <b>1</b> in CD <sub>3</sub> OD |                                            | <b>15</b> prepared from isolated <b>1</b> (lit. <sup>2</sup> ) in CD <sub>3</sub> OD |                                            | our fully synthetic <b>15</b> in CD <sub>3</sub> OD |                                            |
|----------------------|--------------------------------------------------------------|--------------------------------------------|------------------------------------------|--------------------------------------------|--------------------------------------------------------------------------------------|--------------------------------------------|-----------------------------------------------------|--------------------------------------------|
| Pos.                 | $\delta_{\text{C}}$                                          | $\delta_{\text{H}}$ (mult., <i>J</i> [Hz]) | $\delta_{\text{C}}$                      | $\delta_{\text{H}}$ (mult., <i>J</i> [Hz]) | $\delta_{\text{C}}$                                                                  | $\delta_{\text{H}}$ (mult., <i>J</i> [Hz]) | $\delta_{\text{C}}$                                 | $\delta_{\text{H}}$ (mult., <i>J</i> [Hz]) |
| 1                    | 60.9                                                         | 3.74 (dd, 11.5, 4.5)                       | 63.4                                     | 3.65 (dd, 11.0, 4.6)                       | 62.8                                                                                 | 3.60 (m)                                   | 63.2                                                | 3.60 (m)                                   |
|                      |                                                              | 3.62 (dd, 11.5, 7.0)                       |                                          | 3.52 (dd, 11.0, 6.7)                       |                                                                                      | 3.55(m)                                    |                                                     | 3.56 (m)                                   |
| 2                    | 59.0                                                         | 2.99 (dt, 7.0, 4.5)                        | 58.4                                     | 2.77 (dt, 6.7, 5.2)                        | 56.5                                                                                 | 3.54 (m)                                   | 56.8                                                | 3.53 (m)                                   |
| 3                    | 69.3                                                         | 3.64 (m)                                   | 71.4                                     | 3.58 (m)                                   | 70.7                                                                                 | 3.75 (m)                                   | 71.2                                                | 3.76 (m)                                   |
| 4                    | 35.0                                                         | 1.52 (m)                                   | 33.08                                    | 1.58 (m)                                   | 34.7                                                                                 | 1.45 (m)                                   | 33.1                                                | 1.48 (m)                                   |
|                      |                                                              | 1.42 (m)                                   |                                          | 1.52 (m)                                   |                                                                                      |                                            |                                                     |                                            |
| 5                    | 38.7                                                         | 1.55 (m)                                   | 34.8                                     | 1.72 (m)                                   | 38.5                                                                                 | 1.56 (m)                                   | 35.1                                                | 1.69 (m)                                   |
|                      |                                                              | 1.35 (m)                                   |                                          | 1.48 (m)                                   |                                                                                      | 1.38 (m)                                   |                                                     | 1.53 (m)                                   |
| 6                    | 68.3                                                         | 4.35 (m)                                   | 68.1                                     | 4.41 (td, 7.8, 5.8)                        | 67.9                                                                                 | 4.37 (dt, 9.0, 5.7)                        | 68.4                                                | 4.37 (dt, 8.5, 6.7)                        |
| 7                    | 134.0                                                        | 5.31 (dd, 11.0, 9.0)                       | 133.8                                    | 5.36 (dd, 11.0, 9.0)                       | 133.7                                                                                | 5.31 (ddd, 9.3, 7.8, 1.5)                  | 133.9                                               | 5.33 (dd, 11.0, 8.5)                       |
| 8                    | 132.2                                                        | 5.44 (dt, 11.0, 7.5)                       | 132.4                                    | 5.45 (dt, 11.0, 7.3)                       | 131.8                                                                                | 5.45 (dt, 9.3, 6.4)                        | 132.4                                               | 5.44 (dt, 11.0, 7.6)                       |
| 9                    | 28.7                                                         | 2.08 (m)                                   | 28.7                                     | 2.08 (m)                                   | 28.4                                                                                 | 2.09 (m)                                   | 28.7                                                | 2.09 (m)                                   |
| 10-17                | 23.7 - 32.9                                                  | 1.28 - 1.37 (m)                            | 23.7 - 30.9                              | 1.24 - 1.40 (m)                            | 23.5 - 32.5                                                                          | 1.29-1.41 (m)                              | 23.8 - 31.2                                         | 1.28 - 1.40 (m)                            |
| 18                   | 14.1                                                         | 0.90 (t, 7.0)                              | 14.5                                     | 0.90 (t, 7.0)                              | 14.1                                                                                 | 0.91 (t, 6.7)                              | 14.5                                                | 0.90 (t, 7.0)                              |
| Boc-CH <sub>3</sub>  | -                                                            | -                                          | -                                        | -                                          | 28.5                                                                                 | 1.45 (s)                                   | 28.8                                                | 1.45 (s)                                   |
| Boc-C=O              | -                                                            | -                                          | -                                        | -                                          | 156.4                                                                                | -                                          | 158.4                                               | -                                          |
| Boc-CCH <sub>3</sub> | -                                                            | -                                          | -                                        | -                                          | 79.6                                                                                 | -                                          | 80.1                                                | -                                          |

### Synthesis and analysis of Mosher amides and Mosher esters **S1-S4**<sup>3,4</sup>

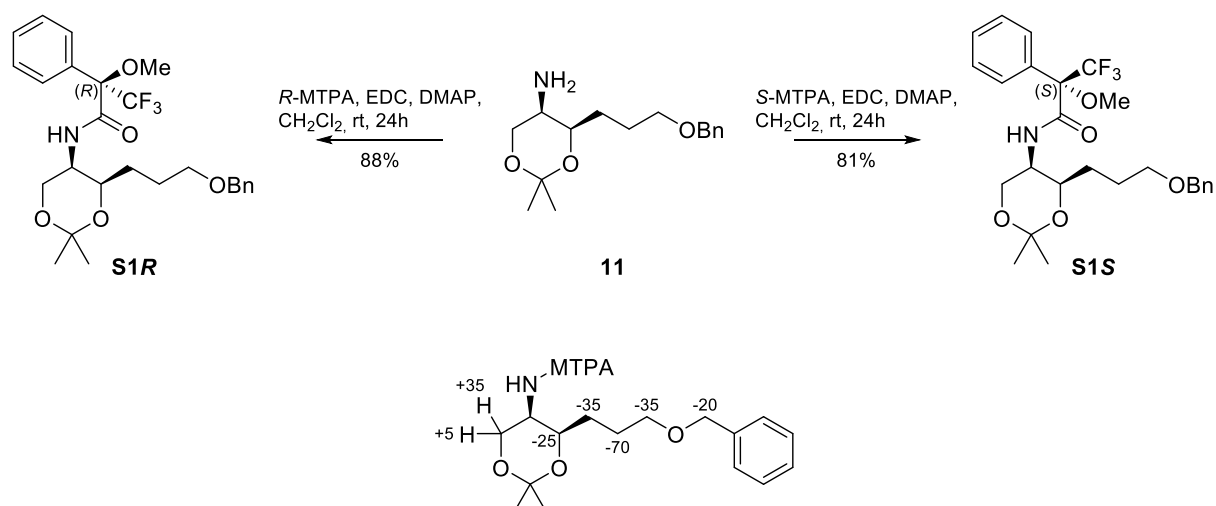

Scheme S1. Synthesis and  $\Delta\delta_{SR} = \delta_S - \delta_R$  values in Hz of the  $^1\text{H}$  NMR spectra of Mosher-amides **S1R** and **S1S**.

#### (R)- and (S)-N-((4R,5R)-4-(3-(benzyloxy)propyl)-2,2-dimethyl-1,3-dioxan-5-yl)-3,3,3-trifluoro-2-methoxy-2-phenylpropanamide (**S1R**, **S1S**)

A solution of amine **11** (25 mg, 89  $\mu\text{mol}$ , 1.0 equiv.) in dry  $\text{CH}_2\text{Cl}_2$  (1 mL) was treated with  $\text{NEt}_3$  (25  $\mu\text{L}$ , 179  $\mu\text{mol}$ , 2.0 equiv.), EDC-HCl (21 mg, 107  $\mu\text{mol}$ , 1.2 equiv.) and (S)- or (R)-MTPA (25 mg, 107  $\mu\text{mol}$ , 1.2 equiv.). The mixture was stirred at ambient temperature for 18 h and volatiles were removed *in vacuo*. The crude products were purified by flash chromatography (*n*-hexane/ethyl acetate 2:1) to give **S1R** and **S1S** as colorless oils;  $R_f = 0.57$  (*n*-hexane/ethyl acetate 2:1); IR ( $\nu_{\text{max}}/\text{cm}^{-1}$ ) 3427, 2951, 1698, 1508, 1271, 1166, 1103, 714, 698; HRMS (ESI)  $m/z$   $[\text{M} + \text{H}]^+$  calcd for  $\text{C}_{26}\text{H}_{33}\text{O}_5\text{NF}_3^+$  496.2305, found 496.2288,  $[\text{M} + \text{Na}]^+$  calcd for  $\text{C}_{26}\text{H}_{33}\text{O}_5\text{NF}_3\text{Na}^+$  518.2125, found 518.2105; **S1R** (43 mg, 72  $\mu\text{mol}$ , 81%):  $[\alpha]_D^{23} = -33.8$  (c 1.0 in  $\text{CHCl}_3$ );  $^1\text{H}$  NMR (500 MHz,  $\text{CDCl}_3$ )  $\delta$  1.37-1.41 (3 H, s,  $\text{CH}_3$ ), 1.42-1.46 (3 H, s,  $\text{CH}_3$ ), 1.48-1.57 (1 H, m,  $\text{CHHCCOBn}$ ), 1.58-1.77 (3 H, m,  $\text{CHHCH}_2\text{COBn}$ ), 3.39 (3 H, s,  $\text{OCH}_3$ ), 3.43-3.52 (2 H, m,  $\text{CH}_2\text{OBn}$ ), 3.70, (1 H, dd,  $J = 12.1, 2.0$  Hz, 6- $\text{H}^a$ ), 3.90 (1 H, ddd,  $J = 9.5, 1.7, 1.7$  Hz,  $\text{CHNH}$ ), 4.00-4.04 (1 H, m, 4-H), 1.06 (1 H, dd,  $J = 12.1, 2.0$  Hz, 6- $\text{H}^b$ ), 4.44-4.54 (2 H, m,  $\text{CH}_2\text{Ph}$ ), 7.26-7.37 (4 H, m, Ph), 7.39-7.45 (3 H, m, Ph), 7.53-7.63 (3 H, m, Ph);  $^{13}\text{C}$  NMR (126 MHz,  $\text{CDCl}_3$ )  $\delta$  18.5 ( $\text{CH}_3$ ), 25.0 ( $\text{CCOBn}$ ), 28.6 ( $\text{CCCOBn}$ ), 29.7 ( $\text{CH}_3$ ), 45.7 (C-5), 54.9 ( $\text{OCH}_3$ ), 64.6 (C-6), 69.8 ( $\text{CH}_2\text{OBn}$ ), 70.8 (C-4), 72.9 ( $\text{CH}_2\text{Ph}$ ), 84.0 ( $^2J_{\text{FC}} = 26.3$  Hz,  $\text{CCF}_3$ ), 99.1 (C-2), 123.9 ( $^1J_{\text{FC}} = 290.6$  Hz,  $\text{CF}_3$ ), 123.9, 127.5, 127.6, 127.7, 128.3, 128.6, 129.4, 132.2, 138.5, 166.0 (NCO); **S1S** (47 mg, 79  $\mu\text{mol}$ , 88%):  $[\alpha]_D^{23} = -5.8$  (c 1.0 in  $\text{CHCl}_3$ );  $^1\text{H}$  NMR (500 MHz,  $\text{CDCl}_3$ )  $\delta$  1.22-1.37 (2 H, m,  $\text{CH}_2\text{CCOBn}$ ), 1.39 (3 H, s,  $\text{CH}_3$ ), 1.42 (3 H, s,  $\text{CH}_3$ ), 1.48-1.65 (2 H, m,  $\text{CH}_2\text{COBn}$ ), 3.28-3.40 (2 H, m,  $\text{CH}_2\text{OBn}$ ), 3.50 (3 H, s,  $\text{OCH}_3$ ), 3.77 (1 H, dd,  $J = 11.9, 1.8$  Hz, 6- $\text{H}^a$ ), 3.90 (1 H, ddd,  $J = 9.7, 1.8, 1.8$  Hz,  $\text{CHNH}$ ), 3.98 (1 H, td,  $J = 6.9, 1.8$  Hz, 4-H), 4.07 (1 H, dd,  $J = 11.9, 1.8$  Hz, 6- $\text{H}^b$ ), 4.45 (2 H, q,  $J = 12.1$  Hz,  $\text{CH}_2\text{Ph}$ ), 7.26-7.40 (8 H, m, Ph), 7.52-7.62 (2 H, m, Ph);  $^{13}\text{C}$  NMR (126 MHz,  $\text{CDCl}_3$ )  $\delta$  18.5 ( $\text{CH}_3$ ), 24.9 ( $\text{CCOBn}$ ), 28.6 ( $\text{CCCOBn}$ ), 29.7 ( $\text{CH}_3$ ), 45.5 (C-5), 55.1 ( $\text{OCH}_3$ ), 64.8 (C-6), 69.7 ( $\text{CH}_2\text{OBn}$ ), 70.8 (C-4), 72.9 ( $\text{CH}_2\text{Ph}$ ), 84.0 ( $^2J_{\text{FC}} = 25.4$  Hz,  $\text{CCF}_3$ ), 99.2 (C-2), ( $^1J_{\text{FC}} = 289.7$  Hz,  $\text{CF}_3$ ) 127.4, 127.6, 127.7, 128.3, 128.4, 129.4, 132.9, 128.4, 166.1 (NCO); The absolute configuration of amine **S1** was confirmed to be *R*.

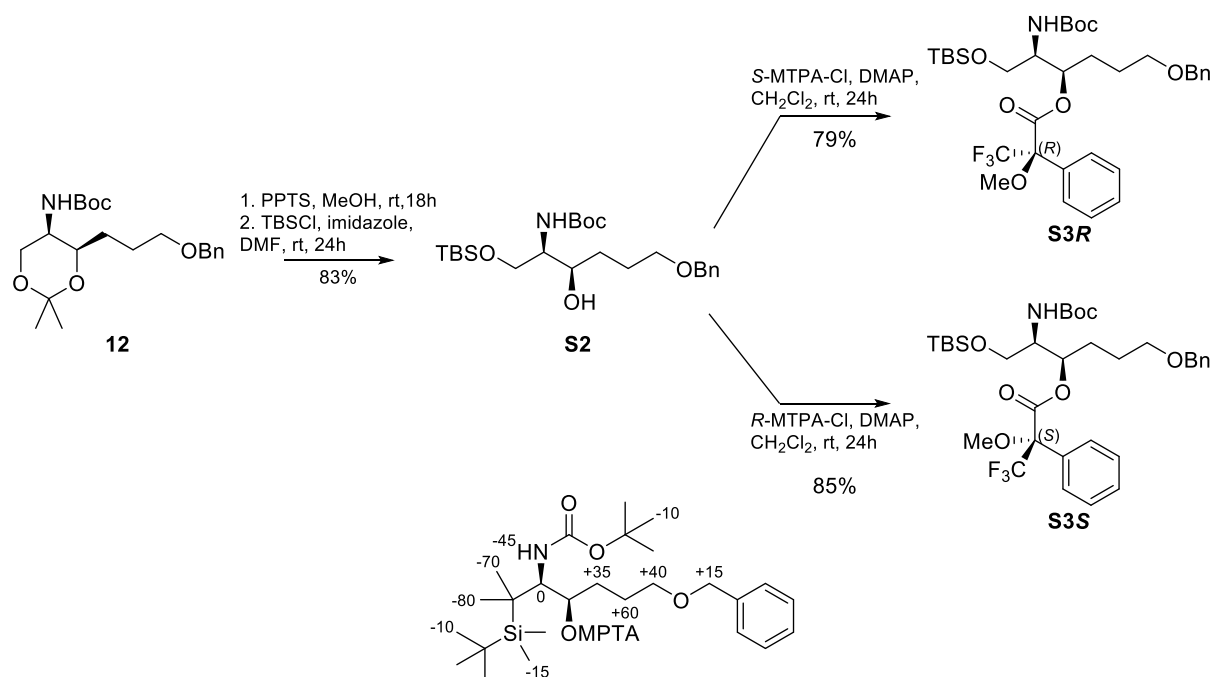

Scheme S2. Synthesis of alcohol **S2**; synthesis and  $\Delta\delta_{SR} = \delta_S - \delta_R$  values in Hz of the  $^1\text{H}$  NMR spectra of Mosher esters **S3R** and **S3S**.

***tert*-Butyl ((2*R*,3*R*)-6-(benzyloxy)-1-((*tert*-butyldimethylsilyl)oxy)-3-hydroxyhexan-2-yl)carbamate (**S2**)**

A solution of carbamate **12** (100 mg, 264  $\mu\text{mol}$ , 1.0 equiv.) in MeOH (2 mL), was treated with PPTS (28 mg, 111  $\mu\text{mol}$ , 0.5 equiv.) and stirred at ambient temperature for 18 h. Volatiles were removed *in vacuo*. The residue was taken up in EtOAc (10 mL) and filtered through a plug of silica. The filtrate was concentrated to dryness. The crude diol was dissolved in DMF (2 mL) and imidazole (30 mg, 441  $\mu\text{mol}$ , 2.0 equiv.) and TBSCl (33 mg, 218  $\mu\text{mol}$ , 1.0 equiv.) were added. The mixture was stirred at ambient temperature for 18 h. Saturated aqueous  $\text{NH}_4\text{Cl}$  (10 mL) was added and the aqueous phase was extracted with  $\text{Et}_2\text{O}$  (3 x 10 mL). The combined organic phases were dried over  $\text{MgSO}_4$  and evaporated to dryness. The crude product was purified by flash chromatography (*n*-hexane/ethyl acetate 6:1) to give alcohol **S2** as a colorless oil (70 mg, 135  $\mu\text{mol}$ , 51%).  $R_f$  = 0.35 (*n*-hexane/ethyl acetate 6:1);  $[\alpha]^{23}_{\text{D}} = -16.7$  ( $c$  1.0 in  $\text{CHCl}_3$ );  $^1\text{H}$  NMR (500 MHz,  $\text{CDCl}_3$ )  $\delta$  0.02-0.09 (6 H, m,  $\text{Si}(\text{CH}_3)_2$ ), 0.84-0.92 (9 H, m,  $\text{Si}(\text{C}(\text{CH}_3)_3)$ ), 1.44 (9 H, s,  $\text{C}(\text{CH}_3)_3$ ), 1.51-1.82 (4 H, m, 4-H, 5-H), 3.47-3.55 (3 H, m,  $\text{CH}_2\text{OBn}$ ,  $\text{CHNH}$ ), 3.77 (1 H, dd,  $J$  = 10.3, 2.9 Hz, 1- $\text{H}^a$ ), 3.87 (1 H, dd,  $J$  = 10.3, 4.0 Hz, 1- $\text{H}^b$ ), 3.93-3.99 (1 H, m, 3-H), 4.46 (2 H, m,  $\text{CH}_2\text{Ph}$ ), 5.16 (1 H, d,  $J$  = 8.9 Hz, NH), 7.26-7.30 (1 H, m, Ph), 7.31-7.36 (4 H, m, Ph);  $^{13}\text{C}$  NMR (126 MHz,  $\text{CDCl}_3$ )  $\delta$  -5.5 ( $\text{Si}(\text{CH}_3)_2$ ), 18.1 ( $\text{Si}(\text{C}(\text{CH}_3)_3)$ ), 25.8 ( $\text{Si}(\text{C}(\text{CH}_3)_3)$ ), 26.0 (C-5), 28.4 ( $\text{C}(\text{CH}_3)_3$ ), 31.0 (C-4), 53.8 (C-2), 66.2 (C-6), 70.2 (C-1), 72.8 (C-3), 72.9 ( $\text{CH}_2\text{Ph}$ ), 79.2 ( $\text{C}(\text{CH}_3)_3$ ), 127.5, 127.6, 128.3, 138.4, 156.0 (NCO); IR ( $\nu_{\text{max}}/\text{cm}^{-1}$ ) 3449, 2928, 2857, 1715, 1692, 1496, 1365, 1252, 1168, 1096, 835, 776, 734, 696; HRMS (ESI)  $m/z$   $[\text{M} + \text{H}]^+$  calcd for  $\text{C}_{24}\text{H}_{44}\text{O}_5\text{NSi}^+$  454.2983, found 454.2970,  $[\text{M} + \text{Na}]^+$  calcd for  $\text{C}_{24}\text{H}_{43}\text{O}_5\text{NNaSi}^+$  476.2803, found 476.2790.

**(2*R*,3*R*)-6-(benzyloxy)-2-((*tert*-butoxycarbonyl)amino)-1-((*tert*-butyldimethylsilyl)oxy)hexan-3-yl-3,3,3-trifluoro-2-methoxy-2-phenylpropanoate (**S3R**, **S3S**)**

A solution of alcohol **S2** (25 mg, 55  $\mu\text{mol}$ , 1.0 equiv.) in dry  $\text{CH}_2\text{Cl}_2$  (1 mL) was treated with DMAP (14 mg, 110  $\mu\text{mol}$ , 2.0 equiv.), and (*S*)- or (*R*)-MTPA-Cl (12  $\mu\text{L}$ , 66  $\mu\text{mol}$ , 1.2 equiv.). The mixture was stirred at ambient temperature for 18 h and volatiles were removed *in vacuo*. The crude products were purified by flash chromatography (*n*-hexane/ethyl acetate 8:1) to give the esters **S3R** and **S3S** as colorless oils.  $R_f$  = 0.43 (*n*-hexane/ethyl acetate 8:1); IR ( $\nu_{\text{max}}/\text{cm}^{-1}$ ) 2953, 2930, 2857, 1746, 1717, 1497,



1253, 1166, 1103, 1016, 835, 778, 697; HRMS (ESI)  $m/z$   $[M + H]^+$  calcd for  $C_{34}H_{51}O_7NF_3Si^+$  670.3381, found 670.3360,  $[M + Na]^+$  calcd for  $C_{34}H_{50}O_7NF_3NaSi^+$  692.3201, found 692.3178; **S3R** (28 mg, 42  $\mu$ mol, 77%):  $[\alpha]^{23}_D = +7.8$  (c 1.0 in  $CHCl_3$ );  $^1H$  NMR (500 MHz,  $CDCl_3$ )  $\delta$  0.05 (6 H, s,  $Si(CH_3)_2$ ), 0.90 (9 H, s,  $SiC(CH_3)_3$ ), 1.39-1.46 (9 H, m,  $C(CH_3)_3$ ), 1.49-1.61 (2 H, m, 4-H), 1.76 (2 H, q,  $J = 7.4$  Hz, 5-H), 3.40 (2 H, t,  $J = 6.1$  Hz,  $CH_2OBn$ ), 3.47 (1 H, dd,  $J = 10.2, 6.6$  Hz, 1-H<sup>a</sup>), 3.53 (3 H, s,  $OCH_3$ ), 3.62 (1 H, dd,  $J = 10.2, 4.4$  Hz, 1-H<sup>b</sup>), 3.84-3.93 (1 H, m,  $CHNH$ ), 4.45 (2 H, s,  $CH_2Ph$ ), 4.66 (1 H, d,  $J = 9.8$  Hz, NH), 5.39 (1 H, q,  $J = 6.1$  Hz, 3-H), 7.26-7.36 (5 H, m, Ph), 7.36-7.43 (3 H, m, Ph), 7.49-7.58 (2 H, m, Ph);  $^{13}C$  NMR (126 MHz,  $CDCl_3$ )  $\delta$  -5.5 ( $Si(CH_3)_2$ ), 18.1 ( $SiC(CH_3)_3$ ), 25.1 (C-5), 25.7 ( $SiC(CH_3)_3$ ), 27.5 (C-4), 28.3 ( $C(CH_3)_3$ ), 53.7 (C-2), 55.3 ( $OCH_3$ ), 62.0 (C-1), 69.4 ( $CH_2OBn$ ), 72.7 ( $CH_2Ph$ ), 74.9 (C-3), 79.6 ( $C(CH_3)_3$ ), 84.6 ( $^2J_{FC} = 27.7$  Hz,  $CCF_3$ ), 123.3 ( $^1J_{FC} = 288.8$  Hz;  $CF_3$ ), 127.4, 128.4, 129.6, 132.0, 138.4, 155.4 (NCO), 166.1 (COO); **S3S** (31 mg, 46  $\mu$ mol, 85%):  $[\alpha]^{23}_D = -16.6$  (c 1.0 in  $CHCl_3$ );  $^1H$  NMR (500 MHz,  $CDCl_3$ )  $\delta$  0.02 (6 H, s,  $Si(CH_3)_2$ ), 0.88 (9 H, s,  $SiC(CH_3)_3$ ), 1.38-1.47 (9 H, m,  $C(CH_3)_3$ ), 1.57-1.76 (2 H, m, 4-H), 1.78-1.68 (2 H, m, 5-H), 3.31 (1 H, dd,  $J = 9.9, 7.5$  Hz, 1-H<sup>a</sup>), 3.45-3.51 (3 H, m, 1-H<sup>b</sup>,  $CH_2OBn$ ), 3.53 (3 H, s,  $OCH_3$ ), 3.85-3.93 (1 H, m,  $CHNH$ ), 4.48 (2 H, s,  $CH_2Ph$ ), 4.52 (1 H, d,  $J = 9.8$  Hz, NH), 5.42 (1 H, td,  $J = 6.4, 3.7$  Hz, 3-H), 7.27-7.36 (5 H, m, Ph), 7.37-7.44 (3 H, m, Ph), 7.53-7.55 (2 H, m, Ph);  $^{13}C$  NMR (126 MHz,  $CDCl_3$ )  $\delta$  -5.5 ( $Si(CH_3)_2$ ), 18.1 ( $SiC(CH_3)_3$ ), 25.3 (C-5), 25.7 ( $SiC(CH_3)_3$ ), 27.7 (C-4), 28.3 ( $C(CH_3)_3$ ), 55.3 (C-2), 55.4 ( $OCH_3$ ), 61.7 (C-1), 69.4 ( $CH_2OBn$ ), 72.7 ( $CH_2Ph$ ), 74.8 (C-3), 79.6 ( $C(CH_3)_3$ ), 123.4 ( $^1J_{FC} = 288.7$  Hz;  $CF_3$ ), 127.5, 127.6, 128.3, 128.4, 129.7, 132.1, 138.4, 155.4 (NCO), 166.1 (COO); The absolute configuration of alcohol **S2** was confirmed to be *R*.

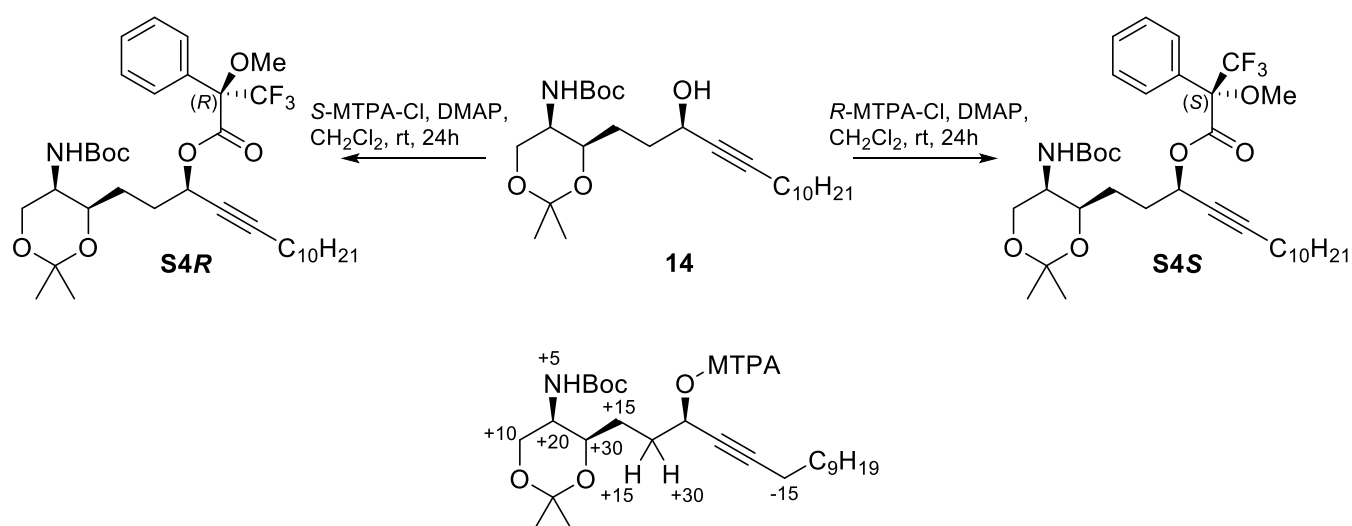

Scheme S3. Synthesis and  $\Delta\delta_{SR} = \delta_S - \delta_R$  values in Hz of the  $^1H$  NMR spectra of Mosher-esters **S4R** and **S4S**

**(*R*)-1-((4''*R*,5''*R*)-5''-((tert-butoxycarbonyl)amino)-2'',2''-dimethyl-1'',3''-dioxan-4''-yl)pentadec-4'-yn-3'-yl-3,3,3-trifluoro-2-methoxy-2-phenylpropanoate (**S4R**, **S4S**)**

A solution of alcohol **14** (25 mg, 55  $\mu$ mol, 1.0 equiv.) in dry  $CH_2Cl_2$  (1 mL) was treated with DMAP (14 mg, 110  $\mu$ mol, 2.0 equiv.), and (*S*)- or (*R*)-MTPA-CL (12  $\mu$ L, 66  $\mu$ mol, 1.2 equiv.). The mixture was stirred at ambient temperature for 18 h and volatiles were removed *in vacuo*. The crude products were purified by flash chromatography (*n*-hexane/ethyl acetate 9:1) to give **S4R** and **S4S** as colorless oils.  $R_f = 0.35$  (*n*-hexane/ethyl acetate 9:1); IR ( $\nu_{max}/cm^{-1}$ ) 2962, 2856, 1750, 1713, 1496, 1244, 1164, 1119, 1081, 986, 718; HRMS (ESI)  $m/z$   $[M + H]^+$  calcd for  $C_{36}H_{55}O_7NF_3^+$  670.3925, found 670.3904,  $[M + Na]^+$  calcd for  $C_{36}H_{54}O_7NF_3Na^+$  692.3745, found 692.3721; **S4R** (32 mg, 50  $\mu$ mol, 90%):  $[\alpha]^{23}_D = +17.1$  (c 1.0 in  $CHCl_3$ );  $^1H$  NMR (500 MHz,  $CDCl_3$ )  $\delta$  0.78-0.83 (3 H, m,  $CH_3$ ), 1.15-1.24 (12 H, m,  $(CH_2)_6$ ), 1.28-1.31 (3 H, m,  $CH_3$ ), 1.32-1.35 (3 H, m,  $CH_3$ ), 1.35-1.40 (9 H, m,  $C(CH_3)_3$ ), 1.40-1.55 (4 H, m, 4-H,  $CH_2$ , 1'-H), 1.67-

1.84 (2 H, m, 2'-H), 2.13 (2 H, td,  $J = 7.2, 2.1$  Hz, 6'-H), 3.37 (1 H, dd,  $J = 9.8, 1.8$  Hz, CHNH), 3.51 (3 H, s, OCH<sub>3</sub>), 3.62-3.69 (1 H, m, 6''-H<sup>a</sup>), 3.79 (1 H, ddd,  $J = 8.5, 5.1, 1.8$  Hz, 4''-H), 3.94 (1 H, dd,  $J = 12.1, 2.0$  Hz, 6''-H<sup>b</sup>), 5.17 (1 H, d,  $J = 9.8$  Hz, NH), 5.45 (1 H, tt,  $J = 6.7, 1.9$  Hz, 3'-H), 7.30-7.38 (3 H, m, Ph), 7.46-7.52 (2 H, m, Ph); <sup>13</sup>C NMR (126 MHz, CDCl<sub>3</sub>)  $\delta$  14.1 (CH<sub>3</sub>), 18.5 (CH<sub>3</sub>), 18.6 (CH<sub>2</sub>), 22.7 (CH<sub>2</sub>), 27.1 (CH<sub>2</sub>), 28.3 (CH<sub>2</sub>), 28.4 (C(CH<sub>3</sub>)<sub>3</sub>), 28.8 (CH<sub>2</sub>), 29.1 (CH<sub>2</sub>), 29.3 (CH<sub>2</sub>), 29.5 (CH<sub>2</sub>), 29.6 (CH<sub>3</sub>), 30.4 (CH<sub>2</sub>), 31.9 (CH<sub>2</sub>), 46.9 (C-5''), 55.4 (OCH<sub>3</sub>), 65.2 (C-6''), 66.4 (C-3'), 70.6 (C-4''), 76.2 (C-5'), 79.4 (C(CH<sub>3</sub>)<sub>3</sub>), 87.9 (C-4'), 99.1 (C-2''), 123.3 (<sup>1</sup>J<sub>FC</sub> = 288.8 Hz, CF<sub>3</sub>), 126.6, 128.3, 129.6, 129.9, 132.4, 155.7 (NCO), 165.7 (COO); <sup>19</sup>F NMR (282 MHz, CDCl<sub>3</sub>)  $\delta$  -71.6 (major), -71.9 (minor); **S4S** (30 mg, 47  $\mu$ mol, 86%): [ $\alpha$ ]<sub>D</sub><sup>23</sup> = -14.1 (*c* 1.0 in CHCl<sub>3</sub>); <sup>1</sup>H NMR (500 MHz, CDCl<sub>3</sub>): 0.85-0.90 (3 H, m, CH<sub>3</sub>), 1.20-1.35 (12 H, m, (CH<sub>2</sub>)<sub>6</sub>), 1.37-1.40 (3 H, m, CH<sub>3</sub>), 1.41-1.49 (12 H, m, CH<sub>3</sub>, C(CH<sub>3</sub>)<sub>3</sub>), 1.52-1.66 (2 H, m, 1'-H), 1.76-1.97 (2 H, m, 2'-H), 2.16 (2 H, td,  $J = 7.2, 1.8$  Hz, 6'-H), 3.47 (1 H, dd,  $J = 9.9, 1.9$  Hz, CHNH), 3.55 (3 H, s, OCH<sub>3</sub>), 3.73 (1 H, dd,  $J = 12.0, 1.8$  Hz, 6''-H<sup>a</sup>), 3.92 (1 H, ddd,  $J = 8.2, 5.2, 1.8$  Hz, 4''-H), 4.02 (1 H, dd,  $J = 12.0, 2.0$  Hz, 6''-H<sup>b</sup>), 5.25 (1 H, d,  $J = 10.1$  Hz, NH), 5.45 (1 H, tt,  $J = 6.7, 1.8$  Hz, 3'-H), 7.38-7.42 (3 H, m, Ph), 7.52-7.55 (2 H, m, Ph); <sup>13</sup>C NMR (126 MHz, CDCl<sub>3</sub>)  $\delta$  14.1 (CH<sub>3</sub>), 18.5 (CH<sub>3</sub>), 18.6 (CH<sub>2</sub>), 22.7 (CH<sub>2</sub>), 27.4 (CH<sub>2</sub>), 28.4 (C(CH<sub>3</sub>)<sub>3</sub>), 28.8 (CH<sub>2</sub>), 29.1 (CH<sub>2</sub>), 29.3 (CH<sub>2</sub>), 29.5 (CH<sub>2</sub>), 29.6 (CH<sub>3</sub>), 30.3 (CH<sub>2</sub>), 31.9 (CH<sub>2</sub>), 46.9 (C-5''), 55.5 (OCH<sub>3</sub>), 65.2 (C-6''), 66.8 (C-3'), 70.8 (C-4''), 76.0 (C-5'), 79.5 (C(CH<sub>3</sub>)<sub>3</sub>), 87.7 (C-4'), 99.1 (C-2''), 123.2 (<sup>1</sup>J<sub>FC</sub> = 287.9 Hz, CF<sub>3</sub>), 127.5, 128.3, 129.6, 132.0, 155.7 (NCO), 165.6 (COO); <sup>19</sup>F NMR (282 MHz, CDCl<sub>3</sub>)  $\delta$  -71.6 (minor), -71.9 (major); The absolute configuration of alcohol **14** was confirmed to be *R*.

# NMR spectra and chromatograms

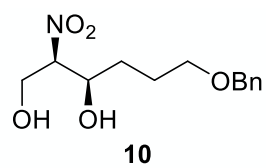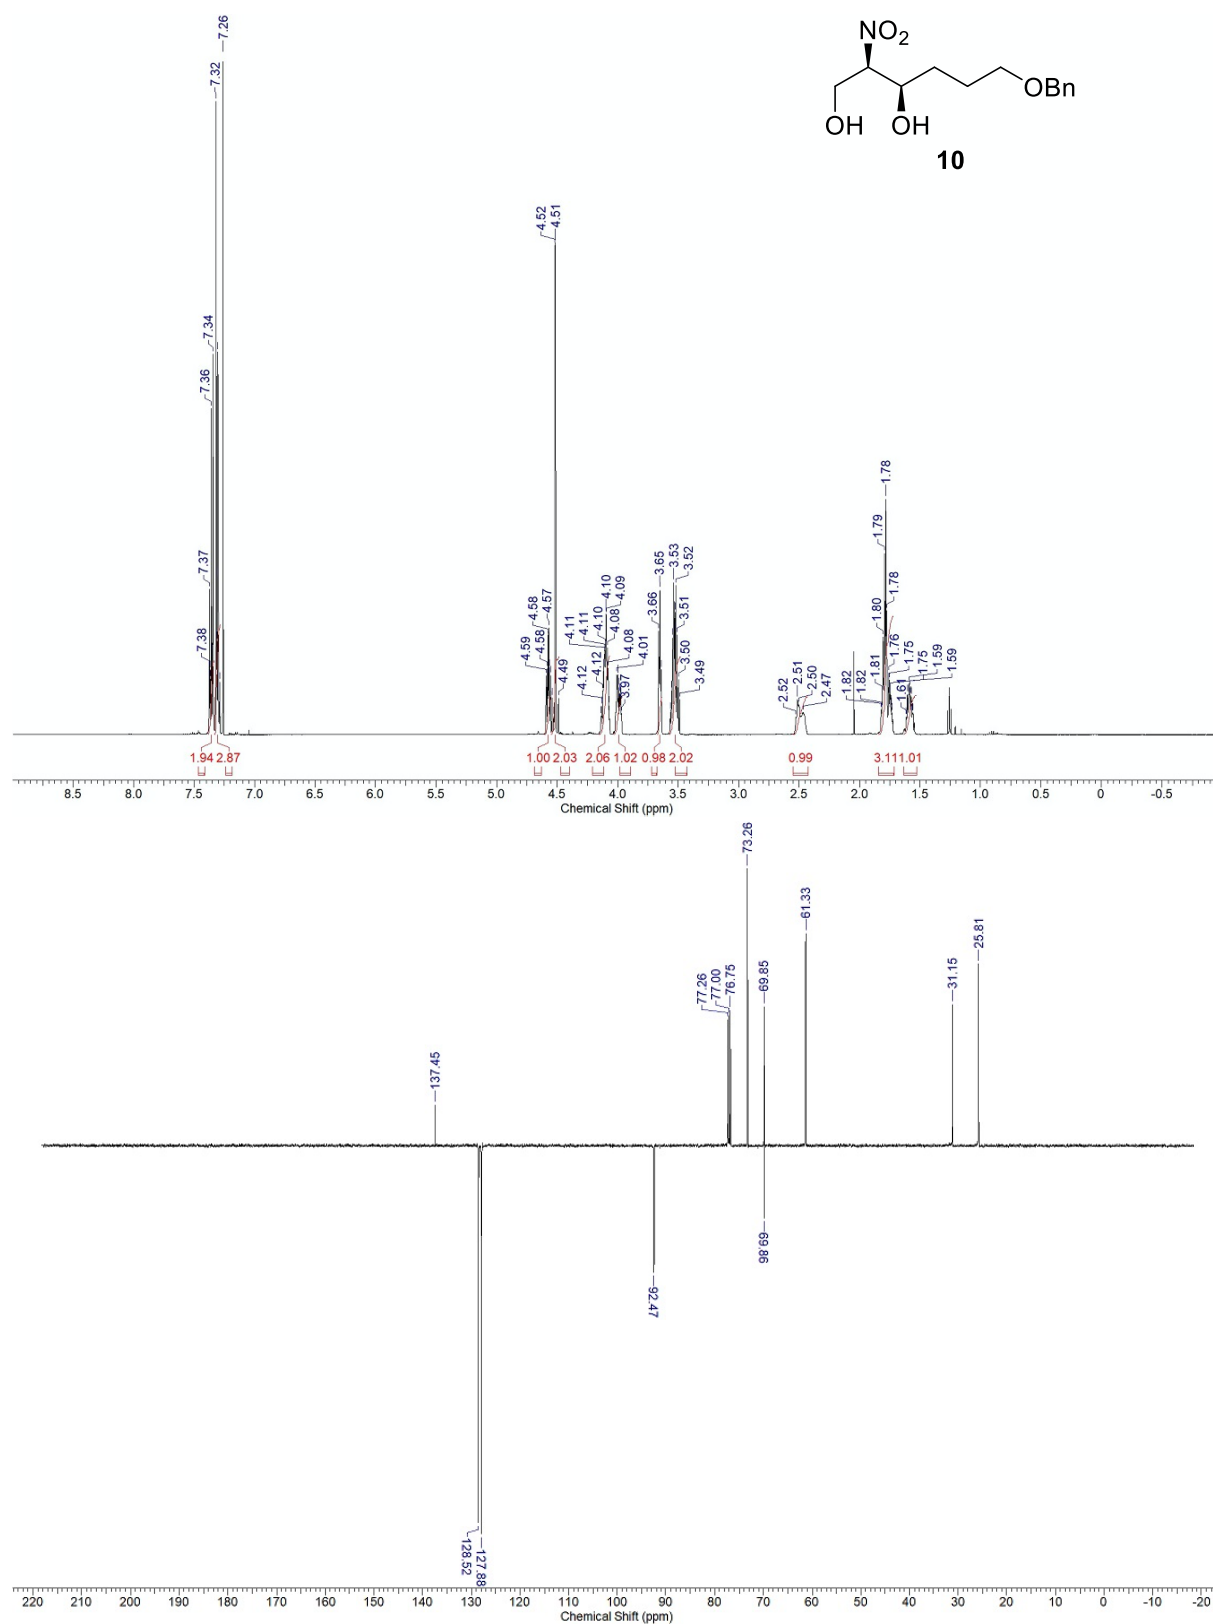

## Custom Report

Data File: C:\32Karat\Projects\ABa\Data\180131\_CSo\_08\_7iPr60\_2

Method: 5% *i*-PrOH (with 0.3% acetic acid) in *n*-Hexane, isocratic for 45 min

Flow Rate: 1.0 mL/min

Instrument Name: HPLC2 (Offline)

Injection Volume: 20 µL

Concentration: 0.9 mg/mL in 10% *i*-PrOH in *n*-Hexane

Analyst: Admin

Acquired: 1/31/2018 12:50:49 PM

Analyzed: 4/12/2018 12:58:38 PM

Printed: 4/12/2018 12:59:15 PM

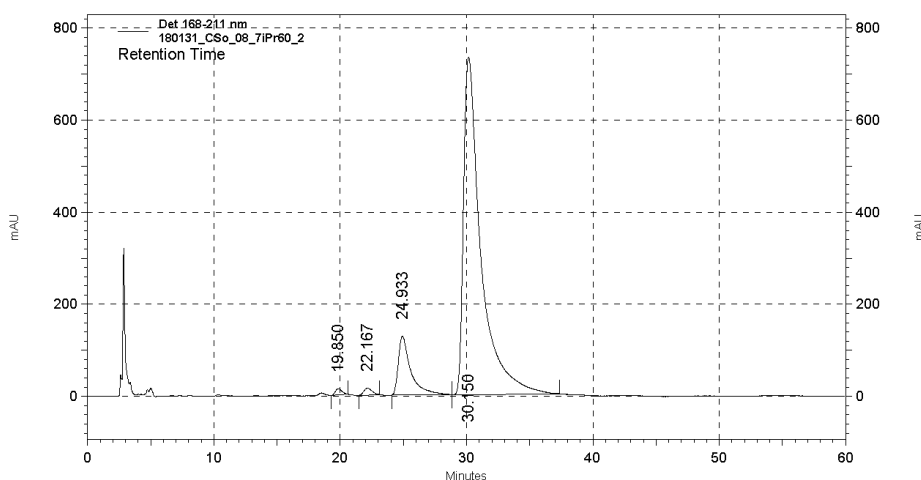

### Det 168-211 nm

#### Results

| Pk # | Time   | Area     | Height | Area Percent |
|------|--------|----------|--------|--------------|
| 1    | 19.850 | 489773   | 13413  | 0.614        |
| 2    | 22.167 | 661137   | 15138  | 0.829        |
| 3    | 24.933 | 8758190  | 127522 | 10.981       |
| 4    | 30.150 | 69848641 | 732468 | 87.576       |

|               |  |          |        |         |
|---------------|--|----------|--------|---------|
| <b>Totals</b> |  | 79757741 | 888541 | 100.000 |
|---------------|--|----------|--------|---------|

HPLC trace of **10**; Phenomenex Lux® Amylose-1; 95:5 Hex/IPA; 1.0 mL/min; *anti* isomer: *tr* (major) = 24.93 min, *tr* (minor) = 19.85 min, 89% *ee*; *syn* isomer: *tr* (major) = 30.15 min, *tr* (minor) = 22.17 min, 98% *ee*; *dr* (*syn/anti*) = 88:12.

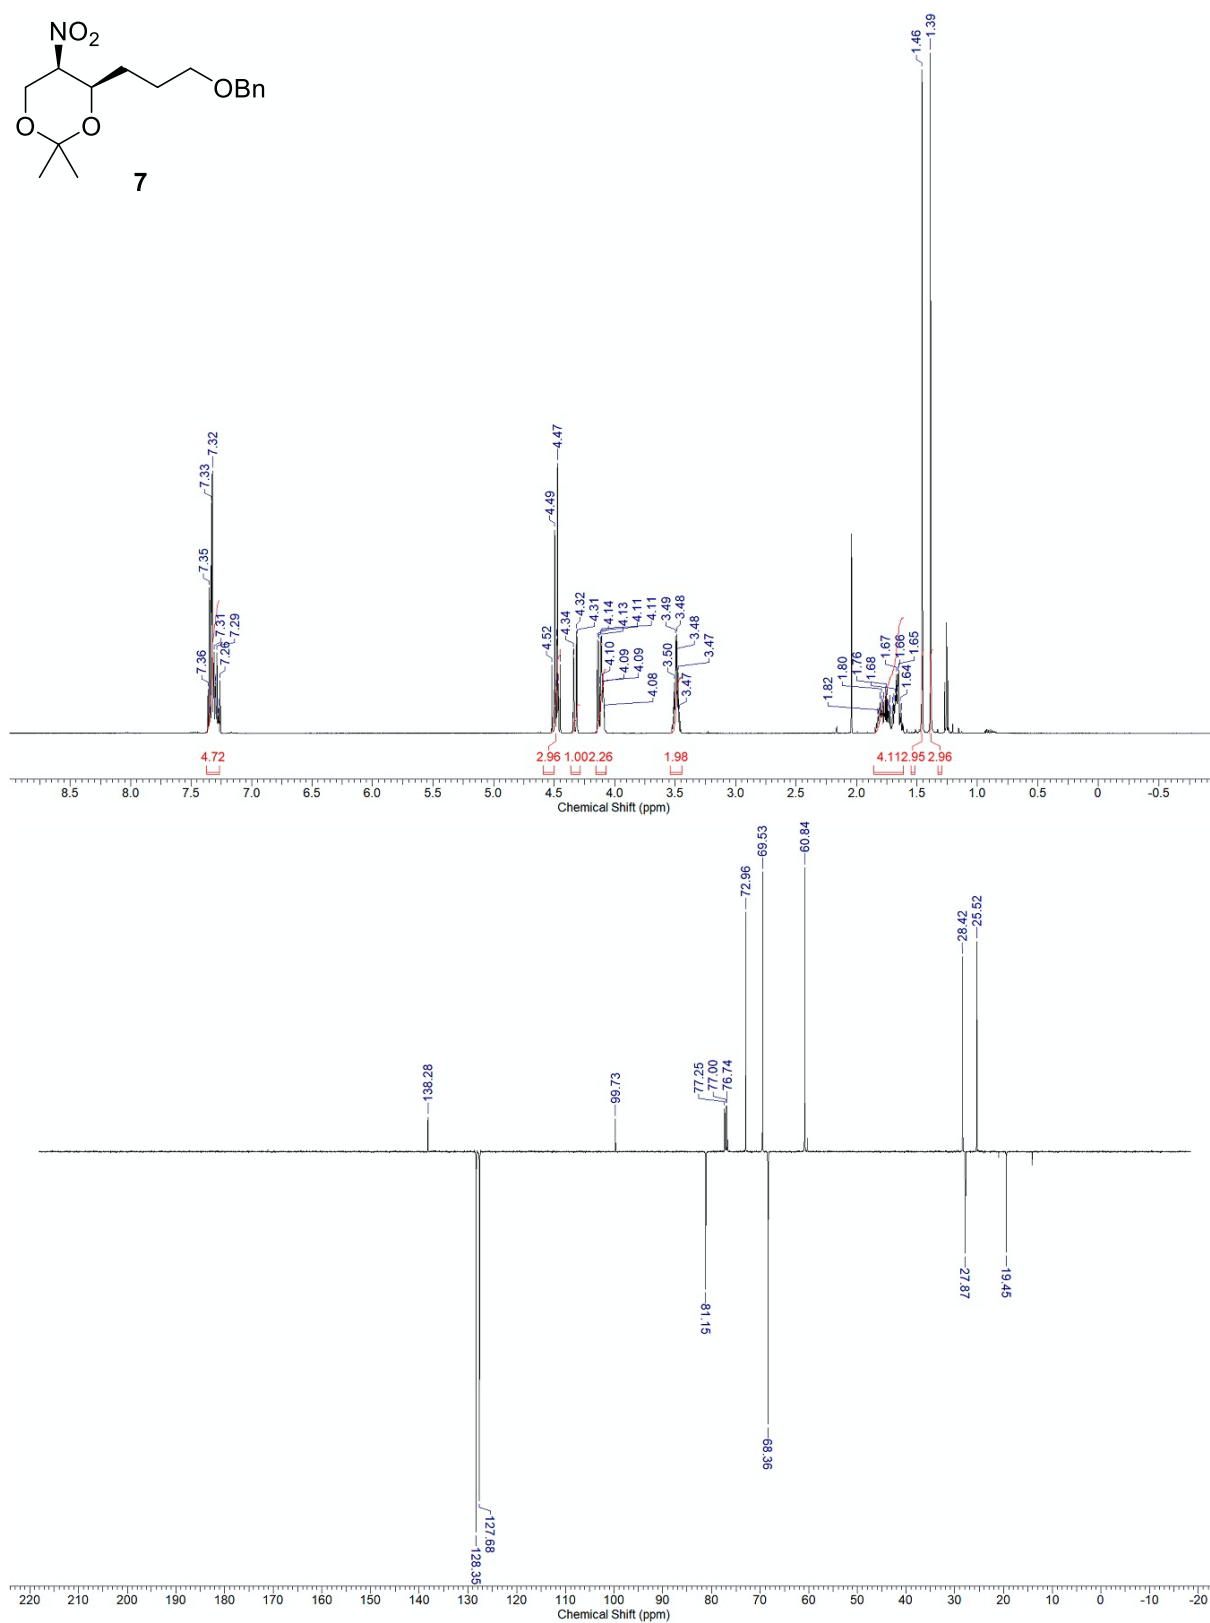

## Custom Report

Data File: C:\32Karat\Projects\ABa\Data\180131\_CSo\_14\_3iPr40

Method: C:\32Karat\Projects\ABa\Methods\180123\_CSo\_08\_7iPr60m.met

Instrument Name: HPLC2 (Offline)

Injection Volume: 20  $\mu$ L

Concentration: 0.5 mg/mL

Analyst: Admin

Acquired: 1/31/2018 10:45:00 AM

Analyzed: 1/31/2018 11:59:16 AM

Printed: 1/31/2018 12:00:32 PM

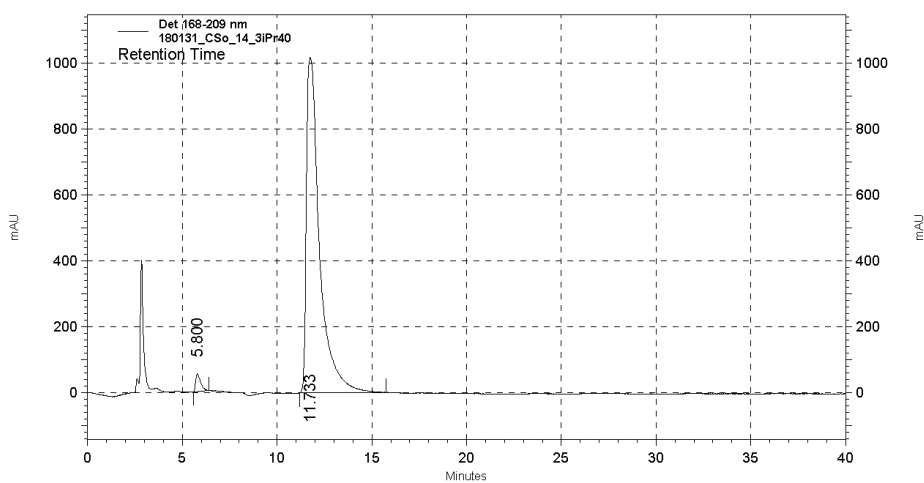

### Det 168-209 nm Results

| Pk #          | Time   | Area     | Height  |
|---------------|--------|----------|---------|
| 1             | 5.800  | 956137   | 54111   |
| 2             | 11.733 | 48883578 | 1017759 |
| <b>Totals</b> |        | 49839715 | 1071870 |

HPLC trace of **7**; Phenomenex Lux® Amylose-1; 95:5 Hex/IPA; 1.0 mL/min; *syn* isomer: *tr* (major) = 11.73 min, *tr* (minor) = 5.80 min

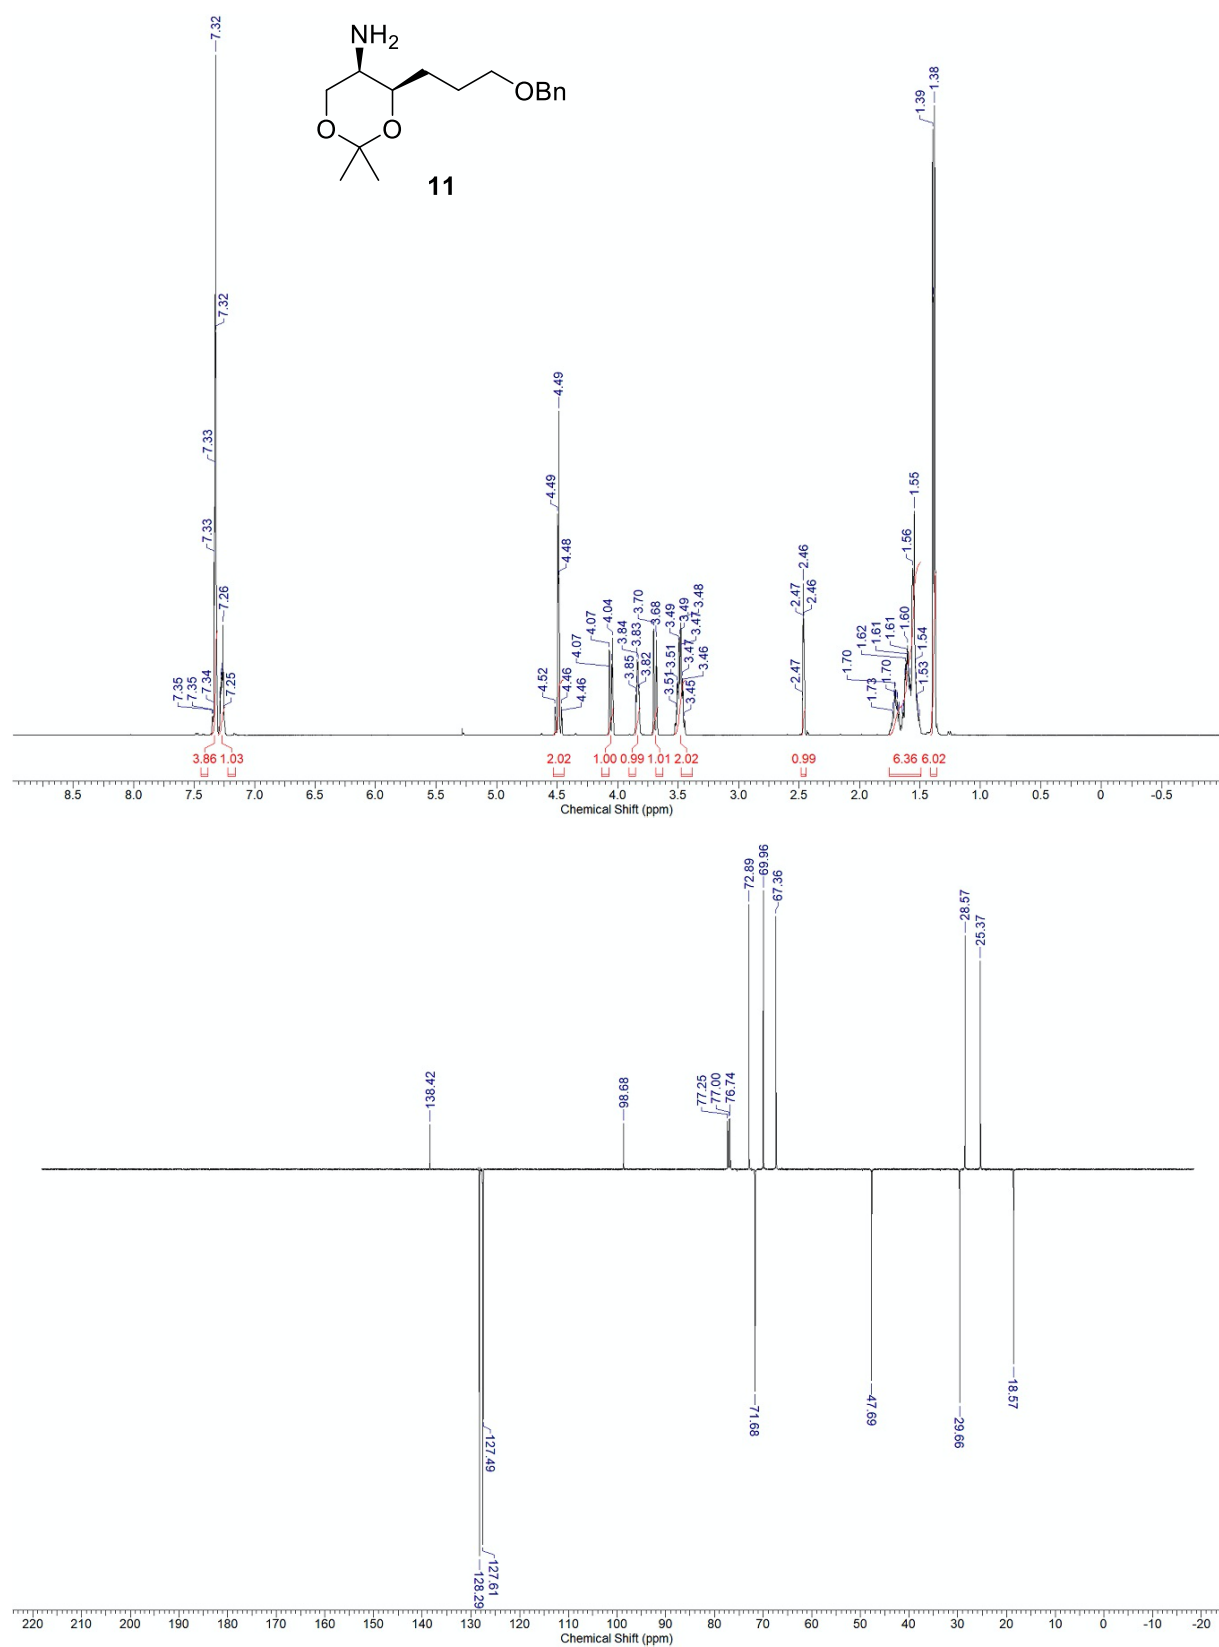

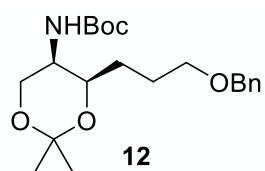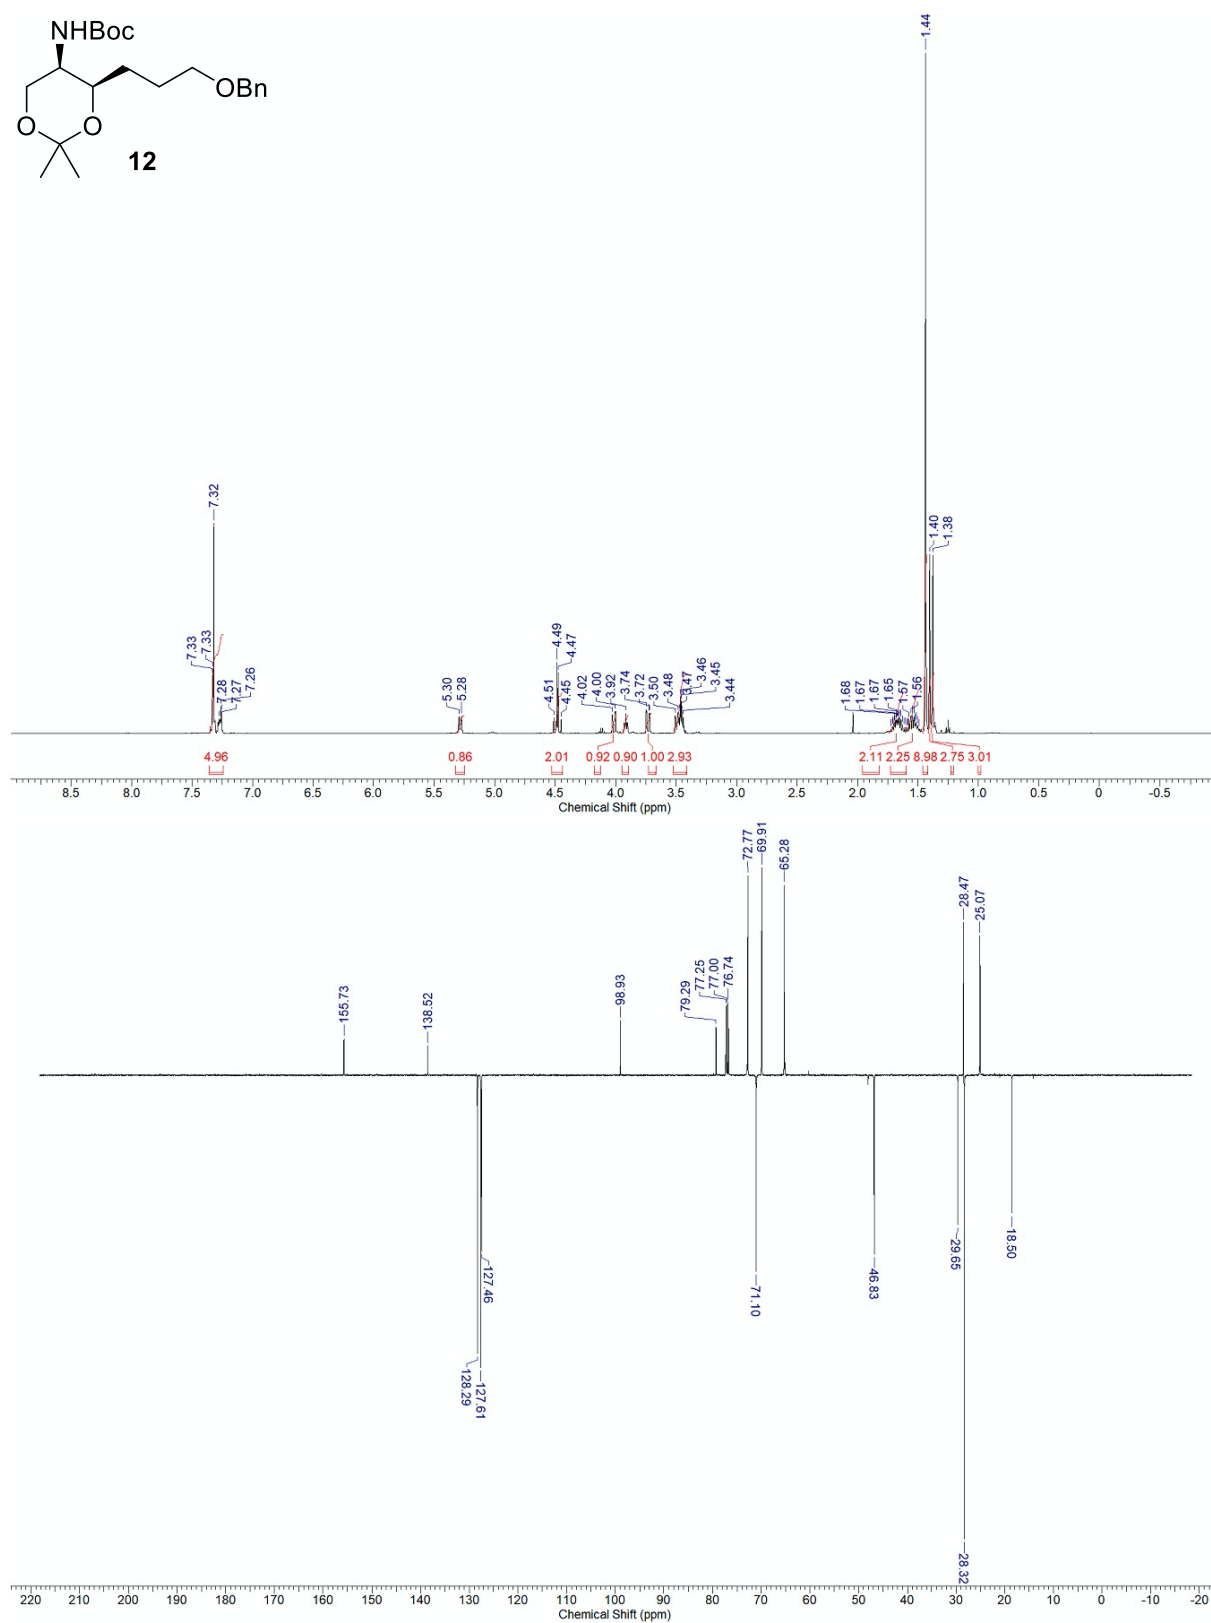



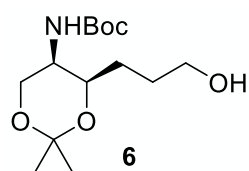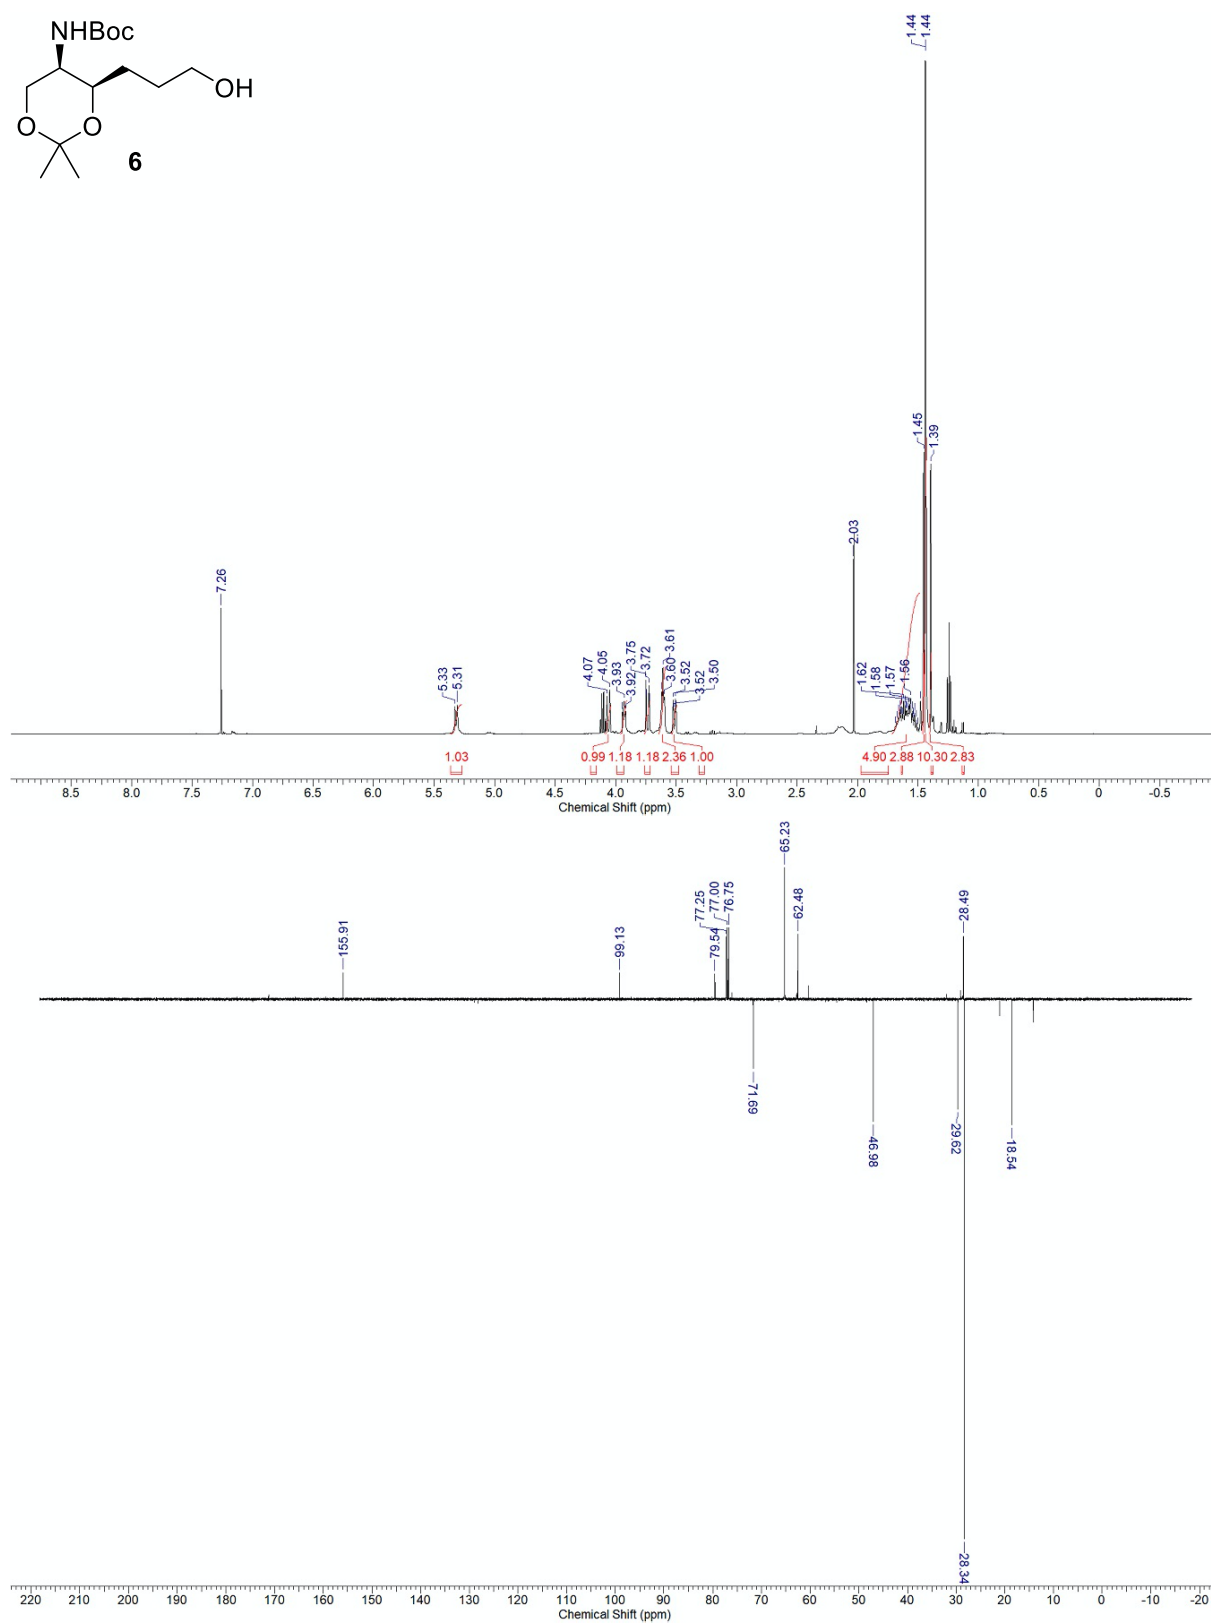

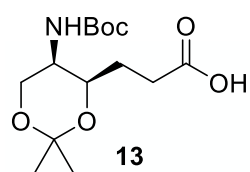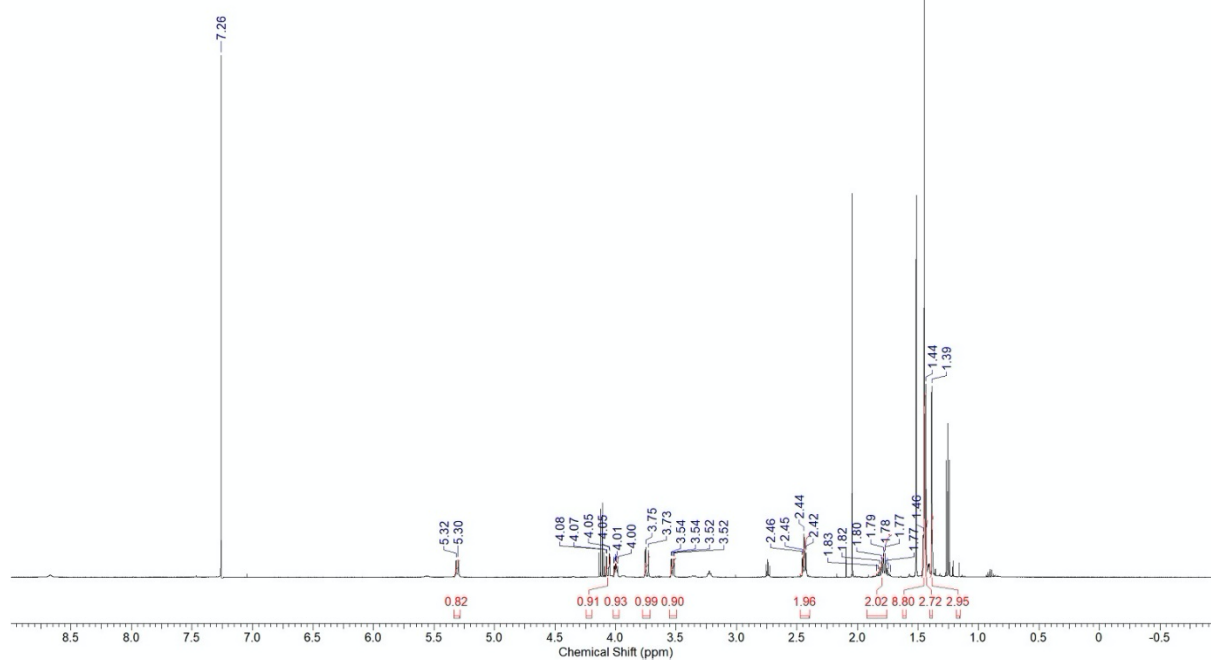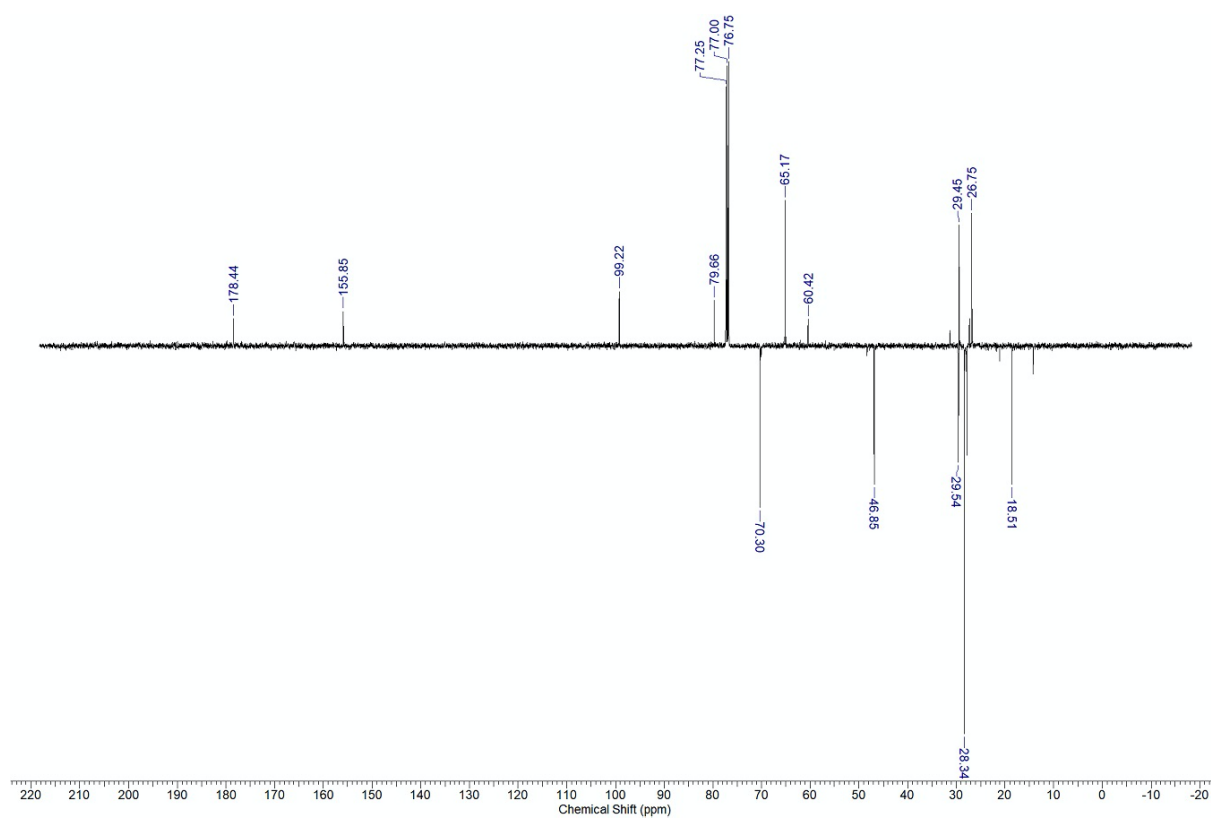

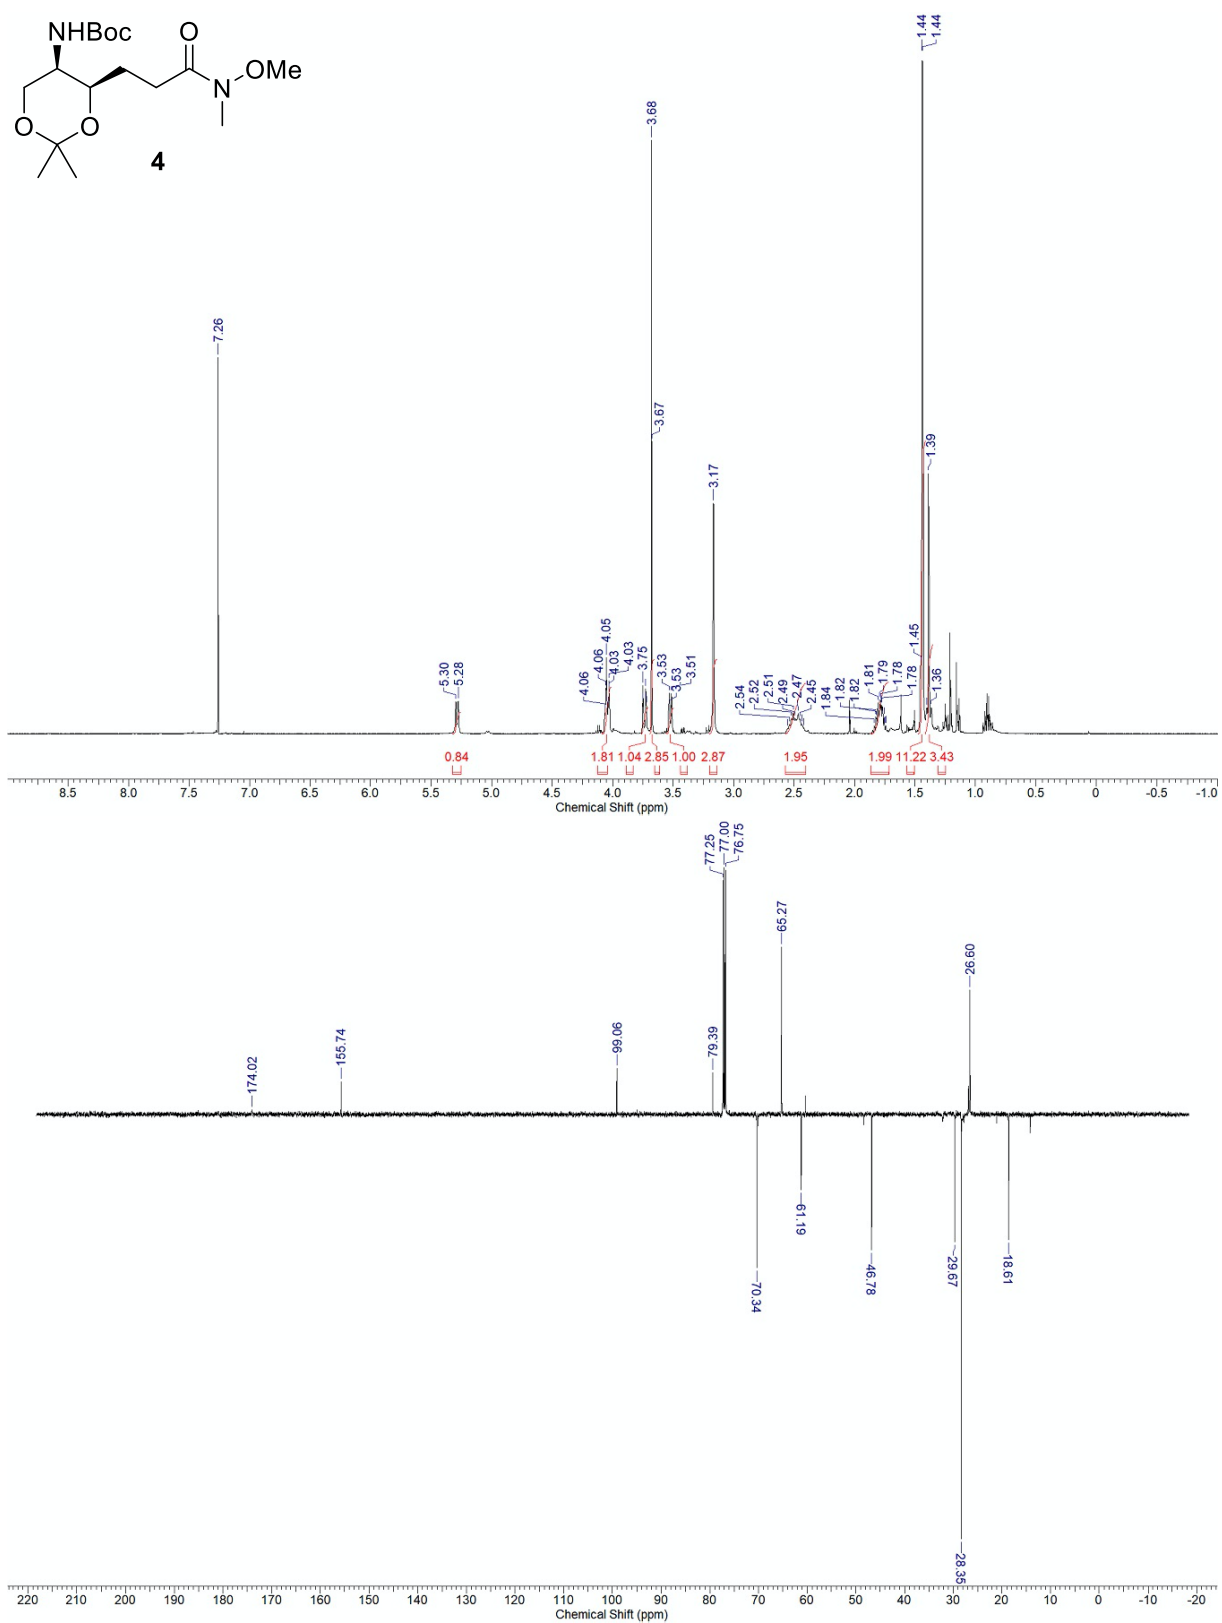

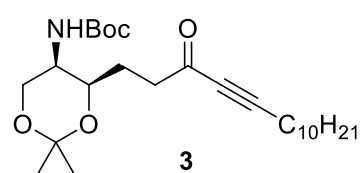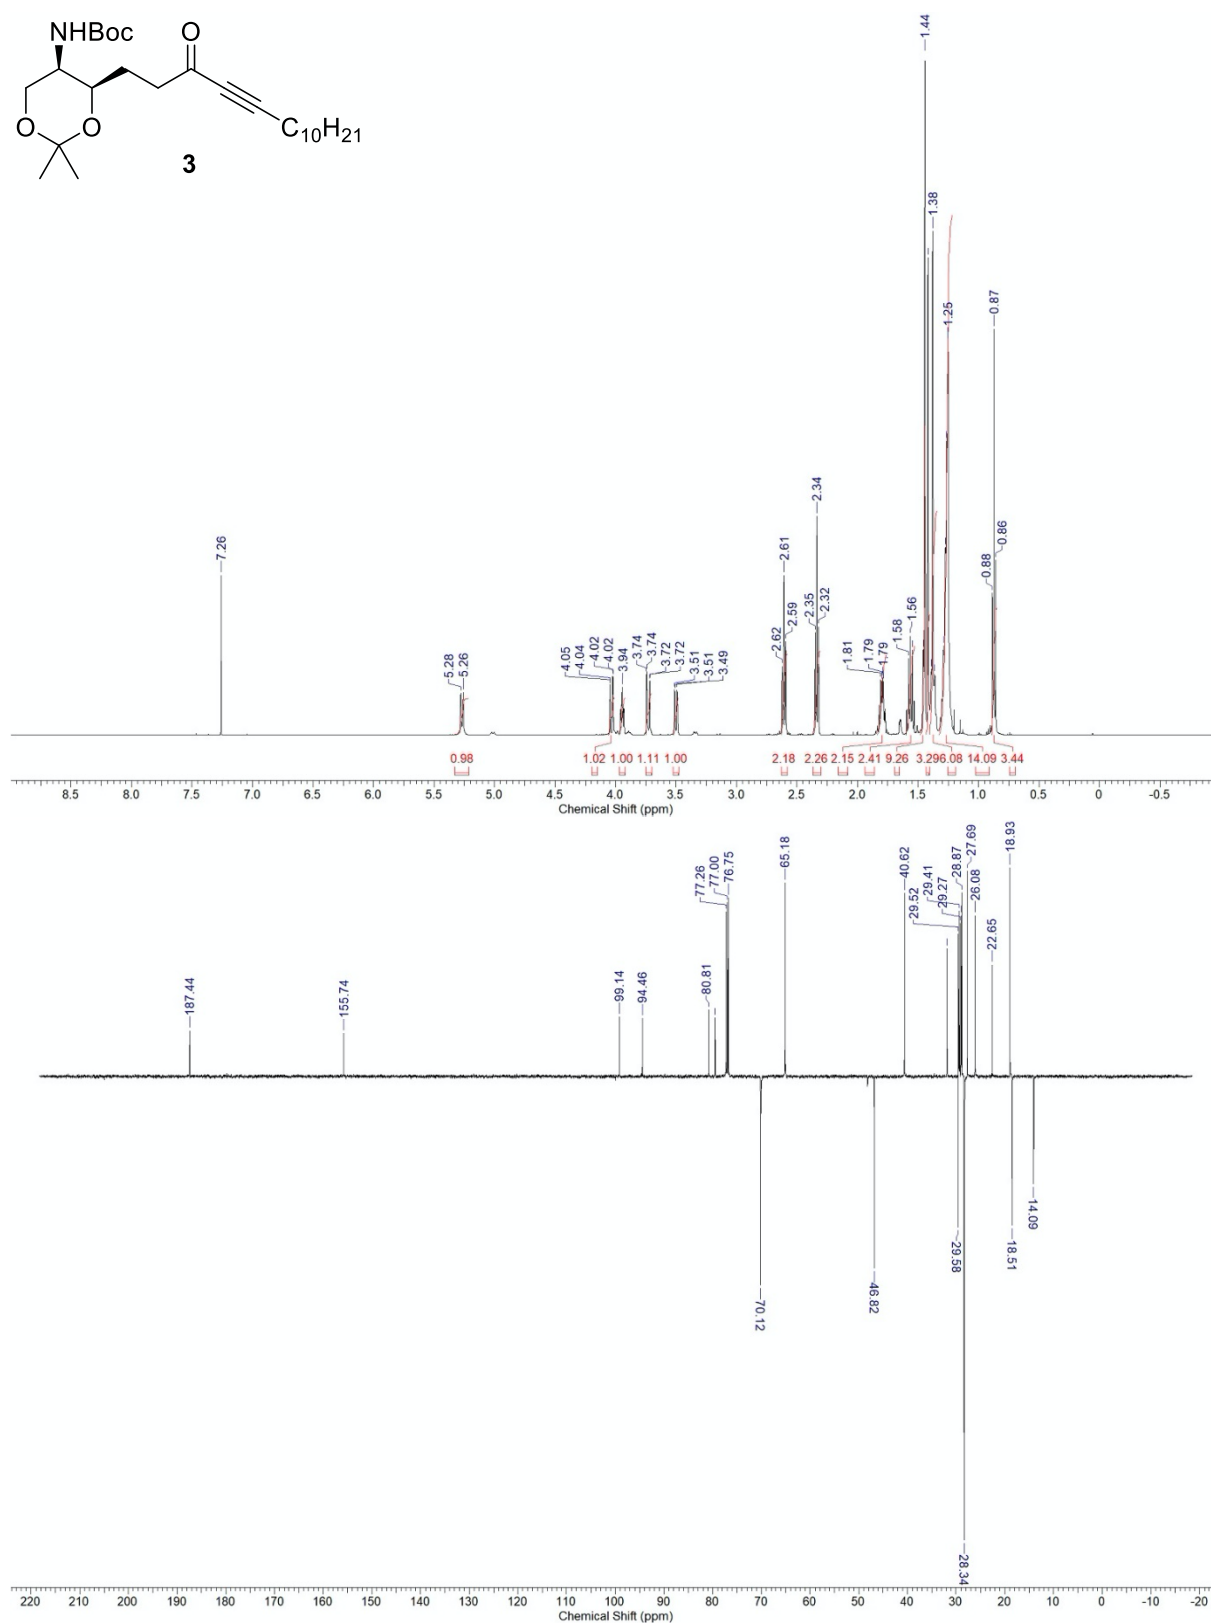

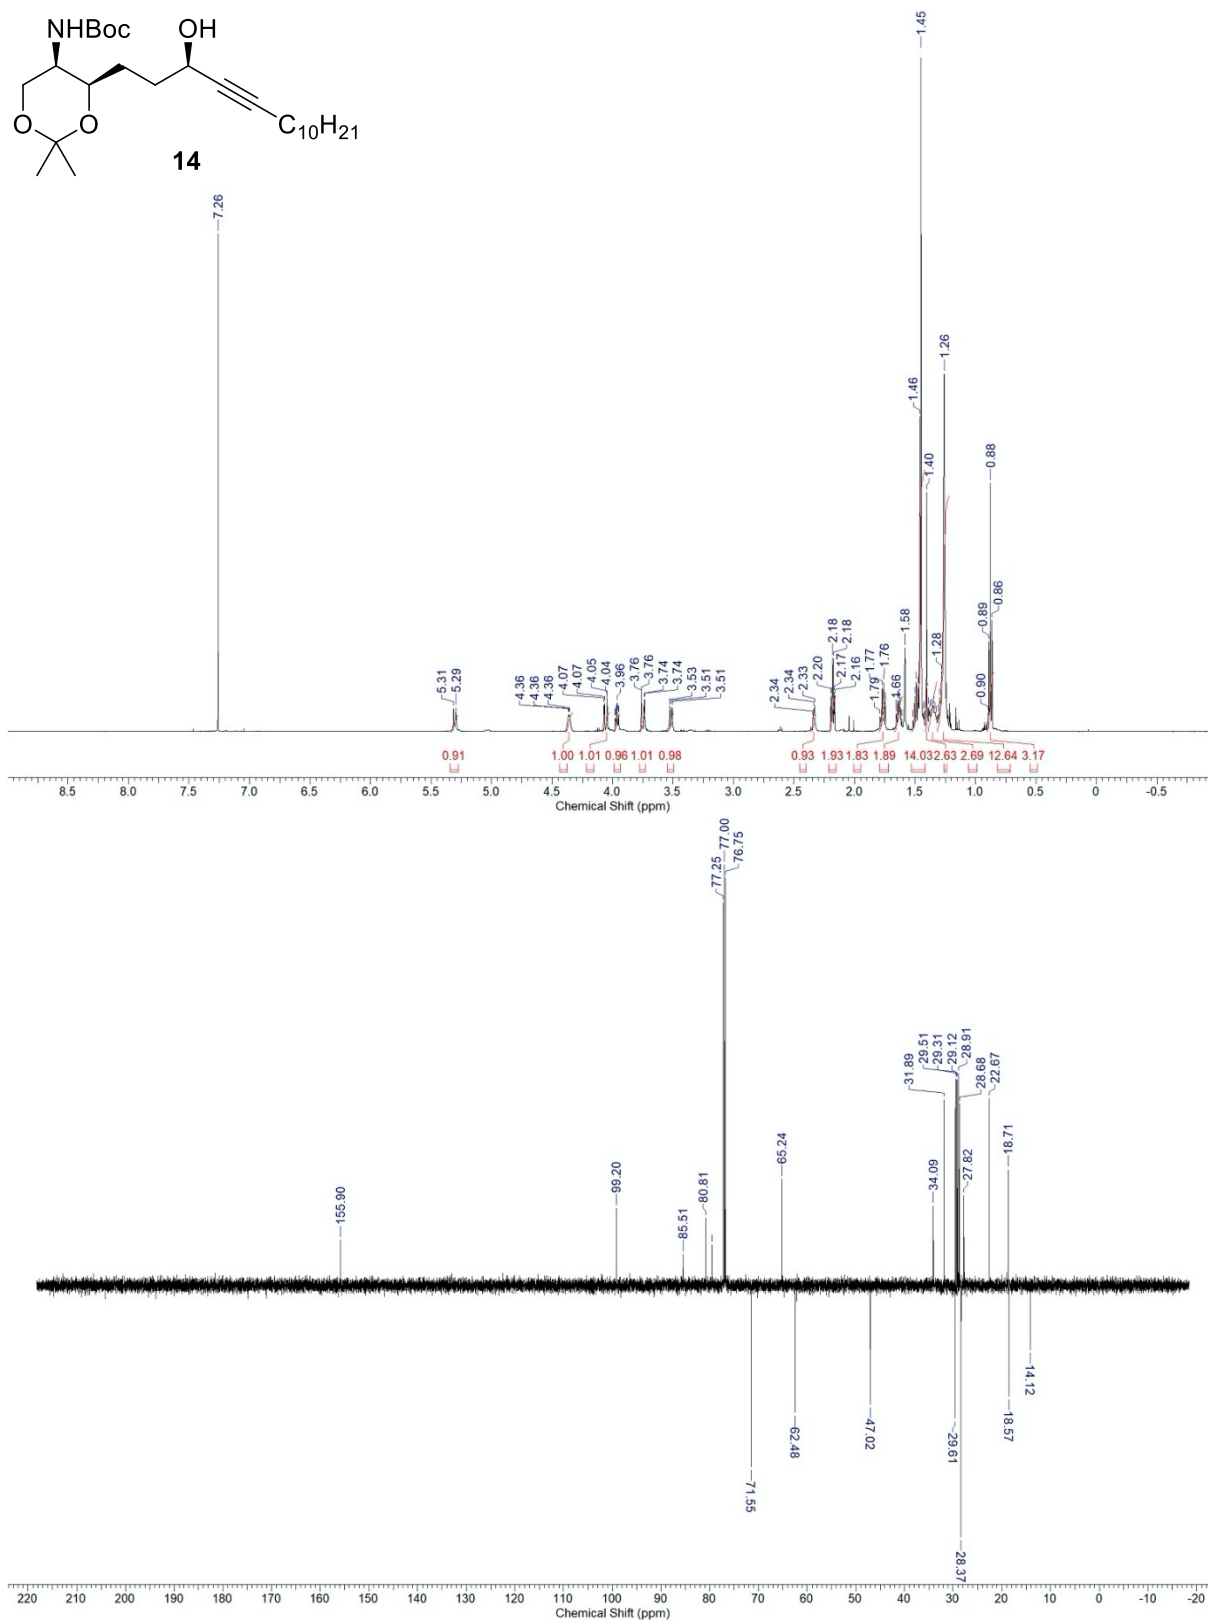

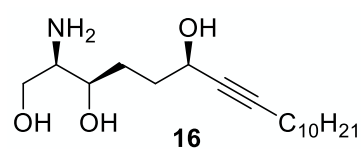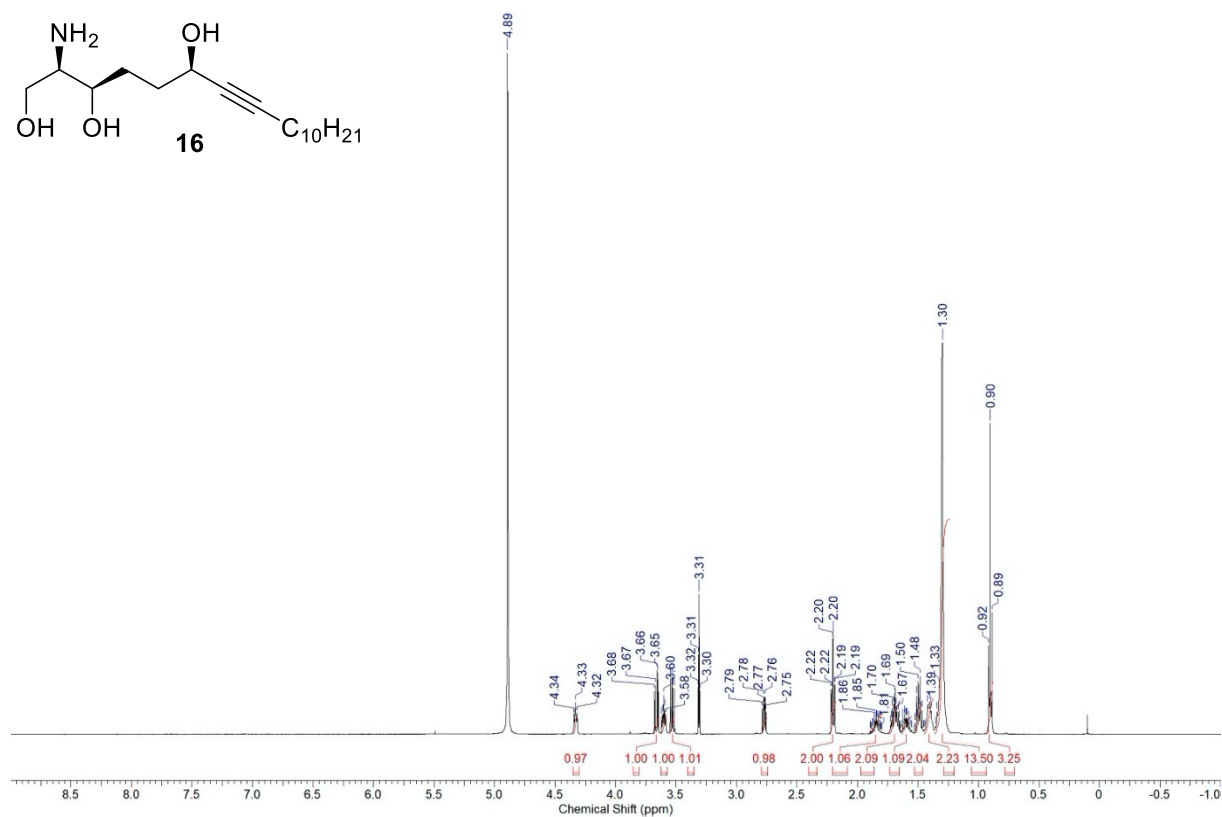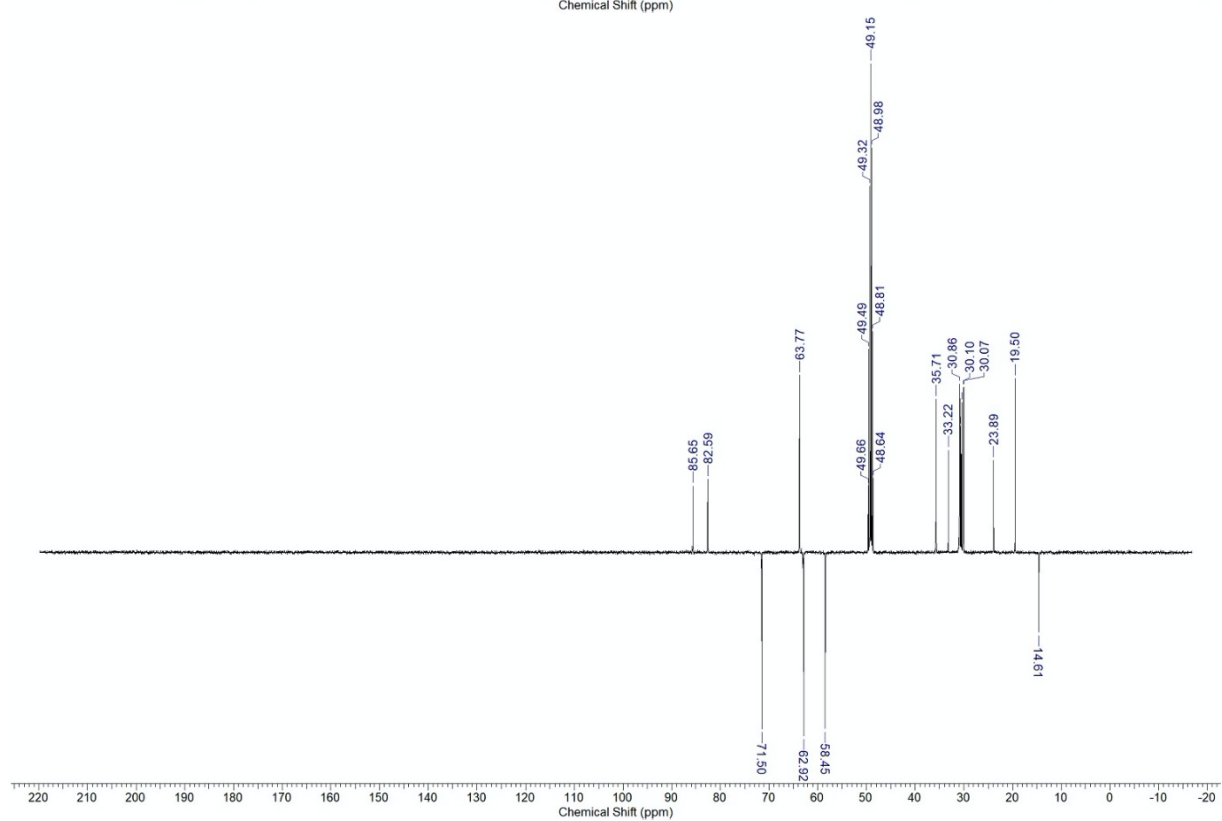

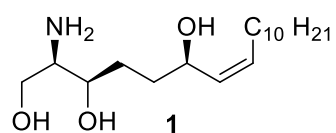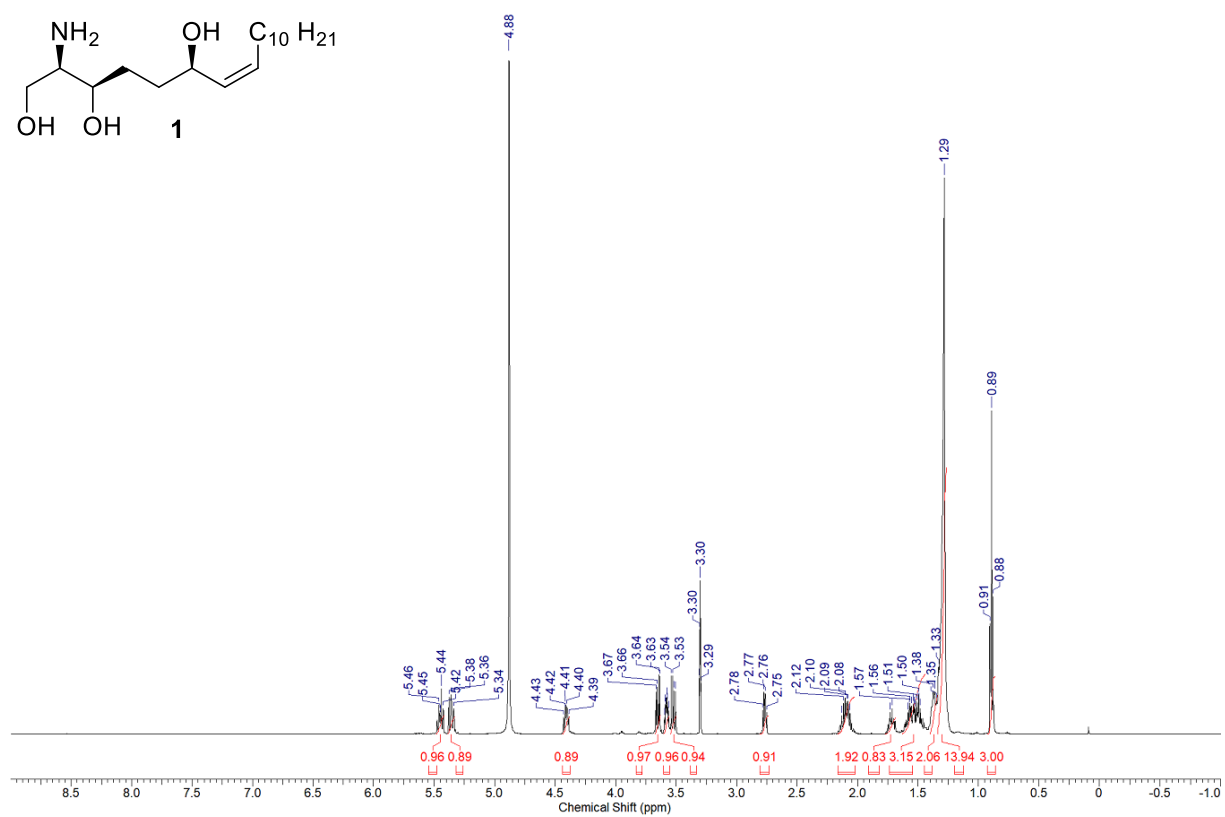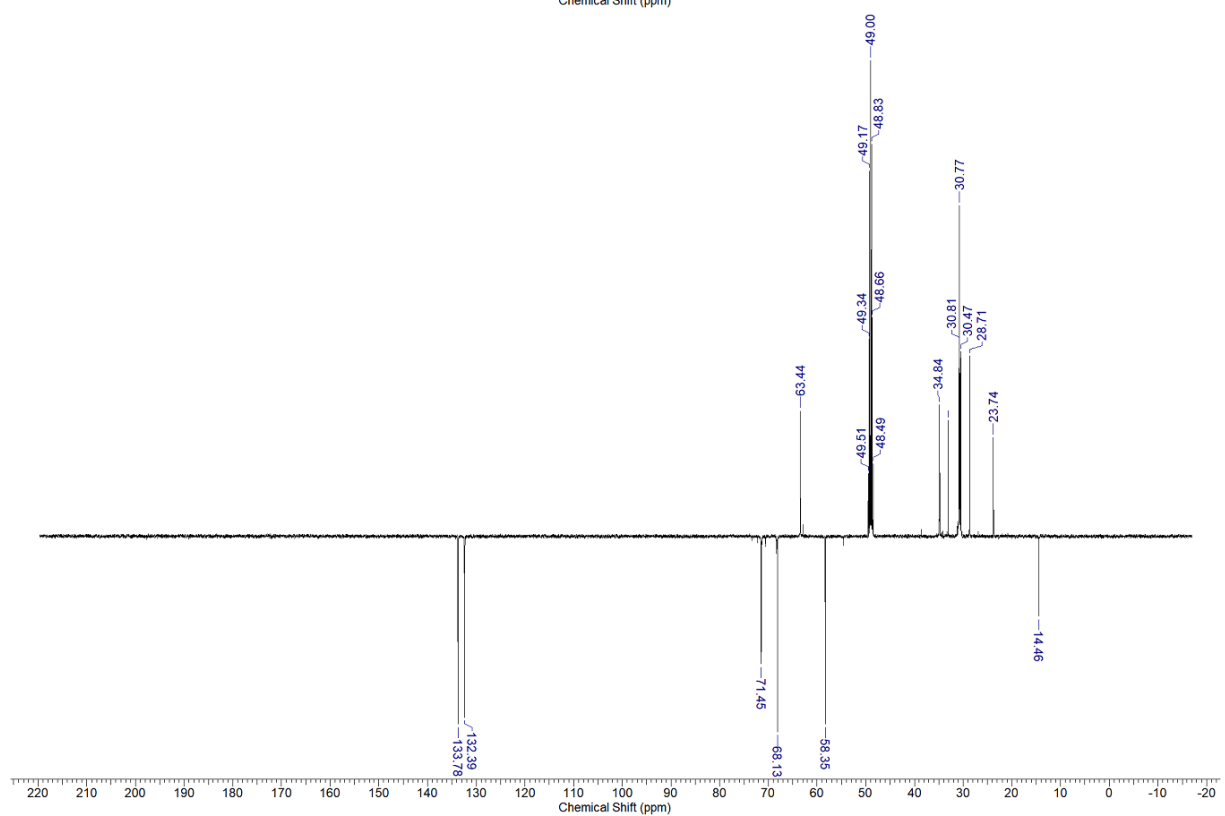

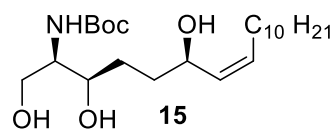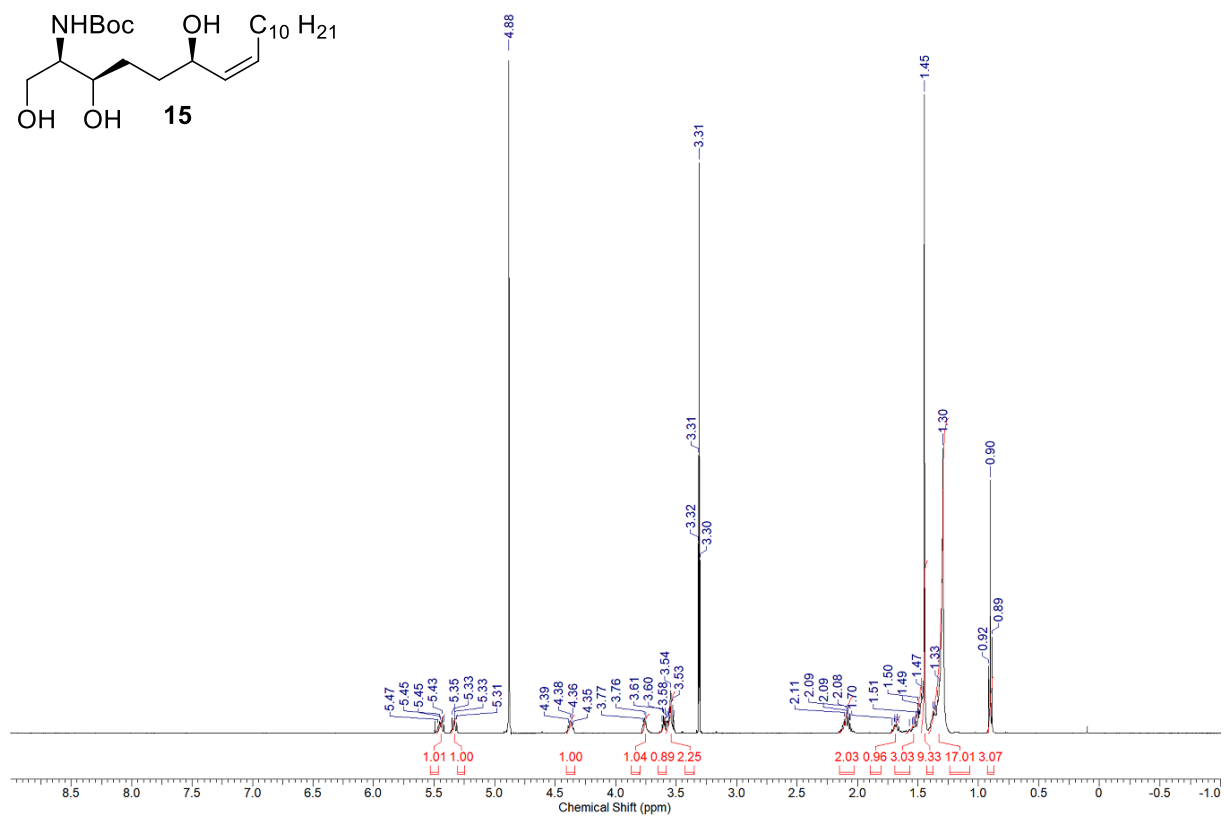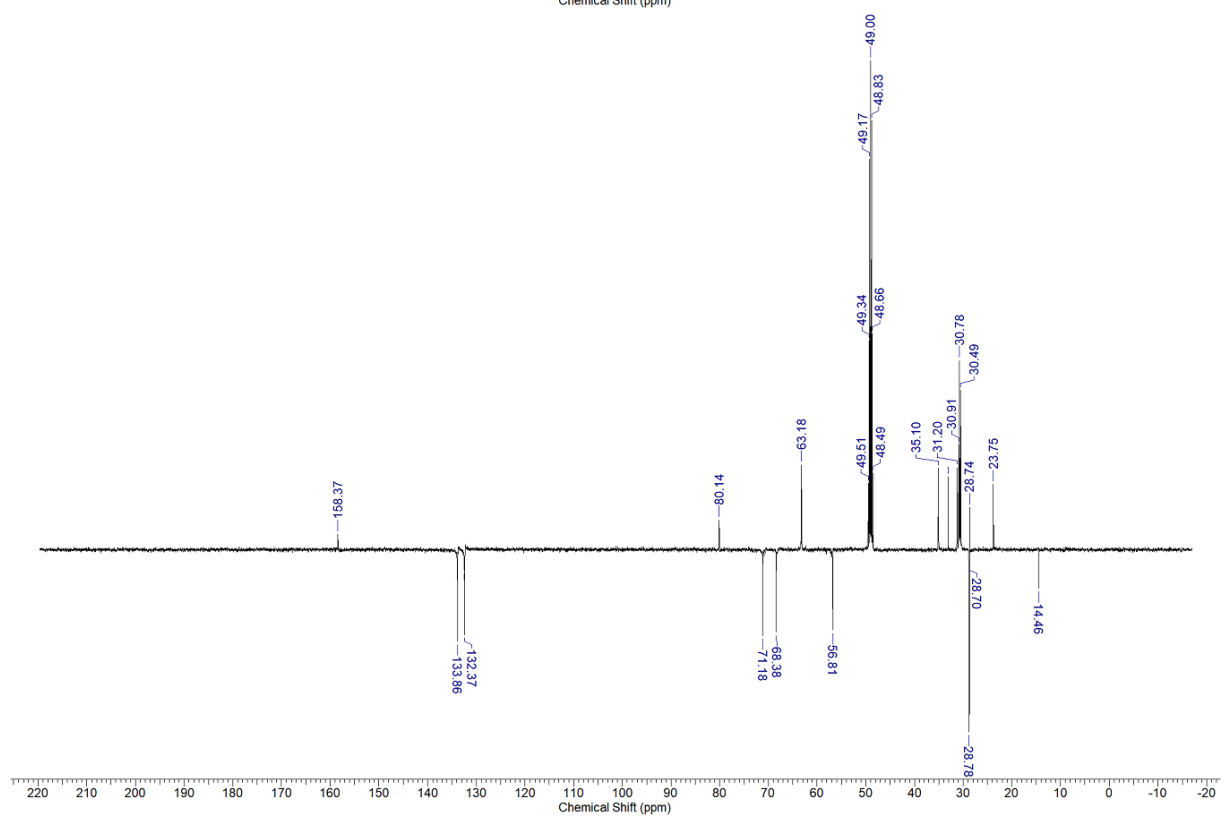



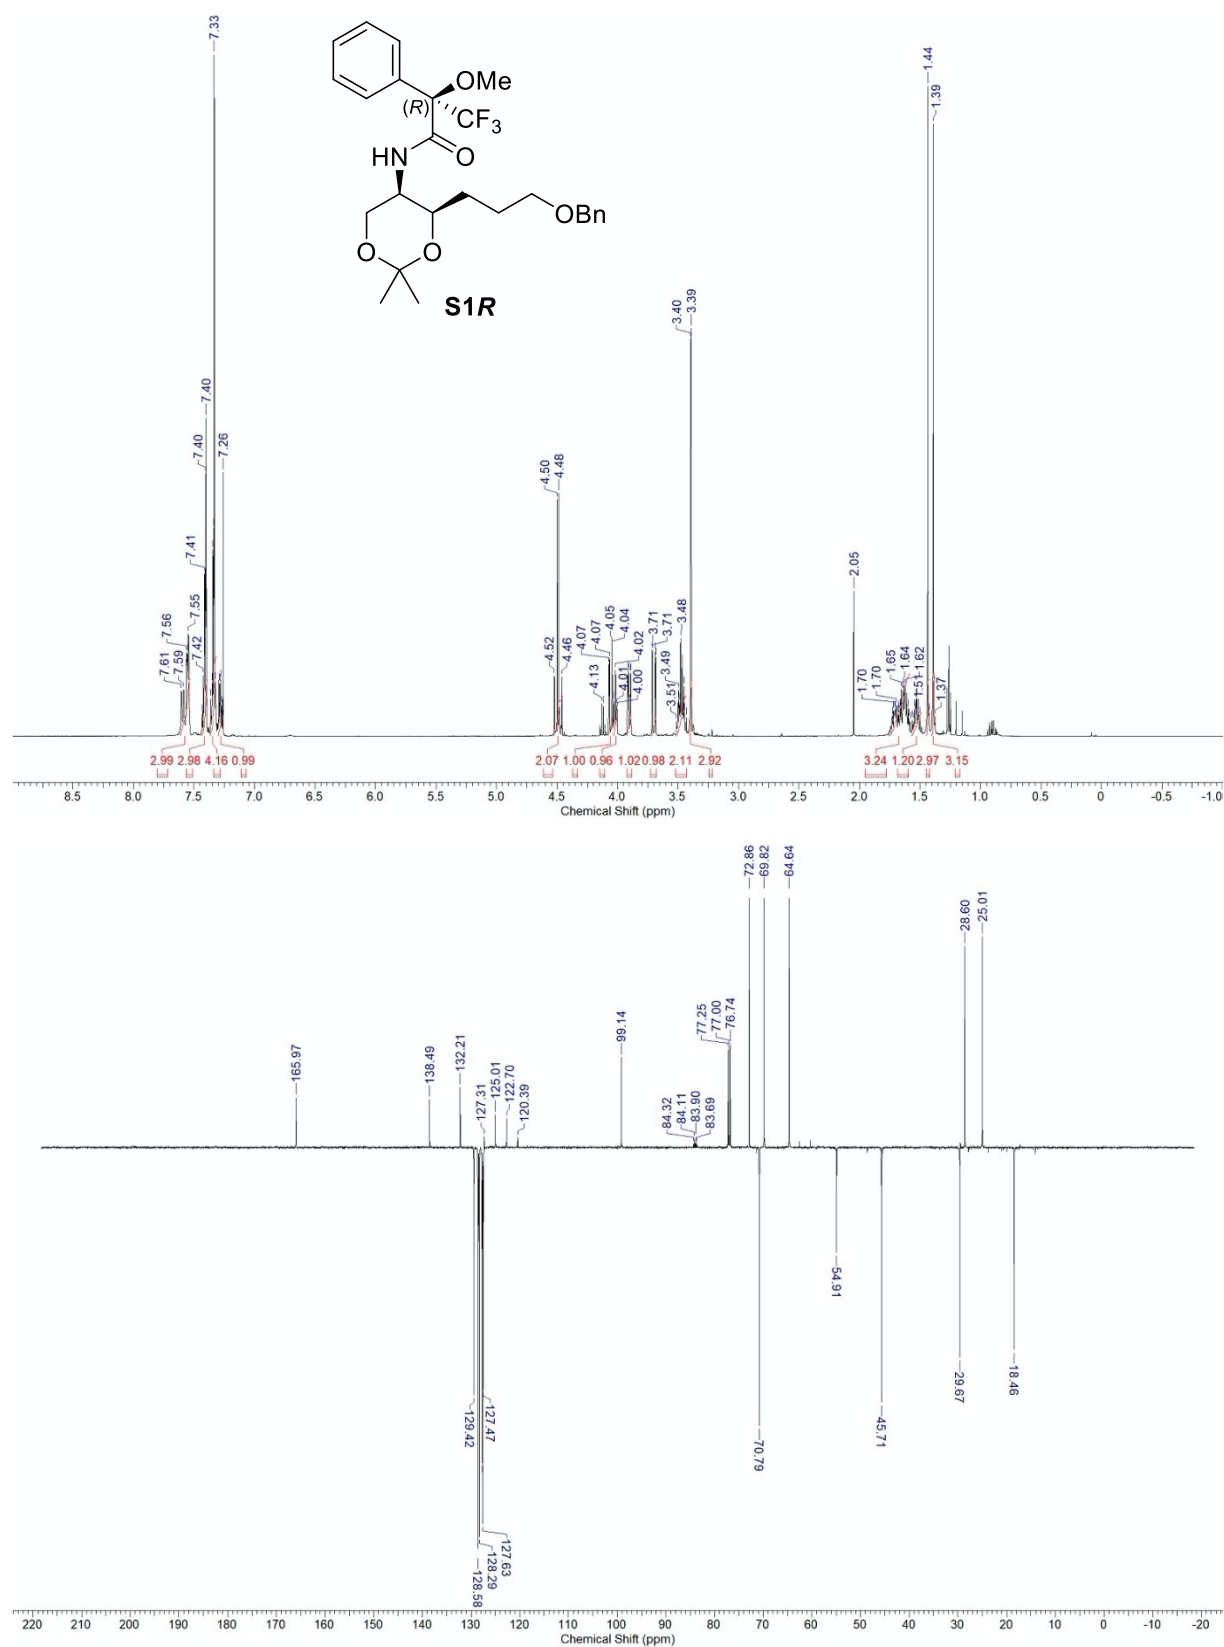

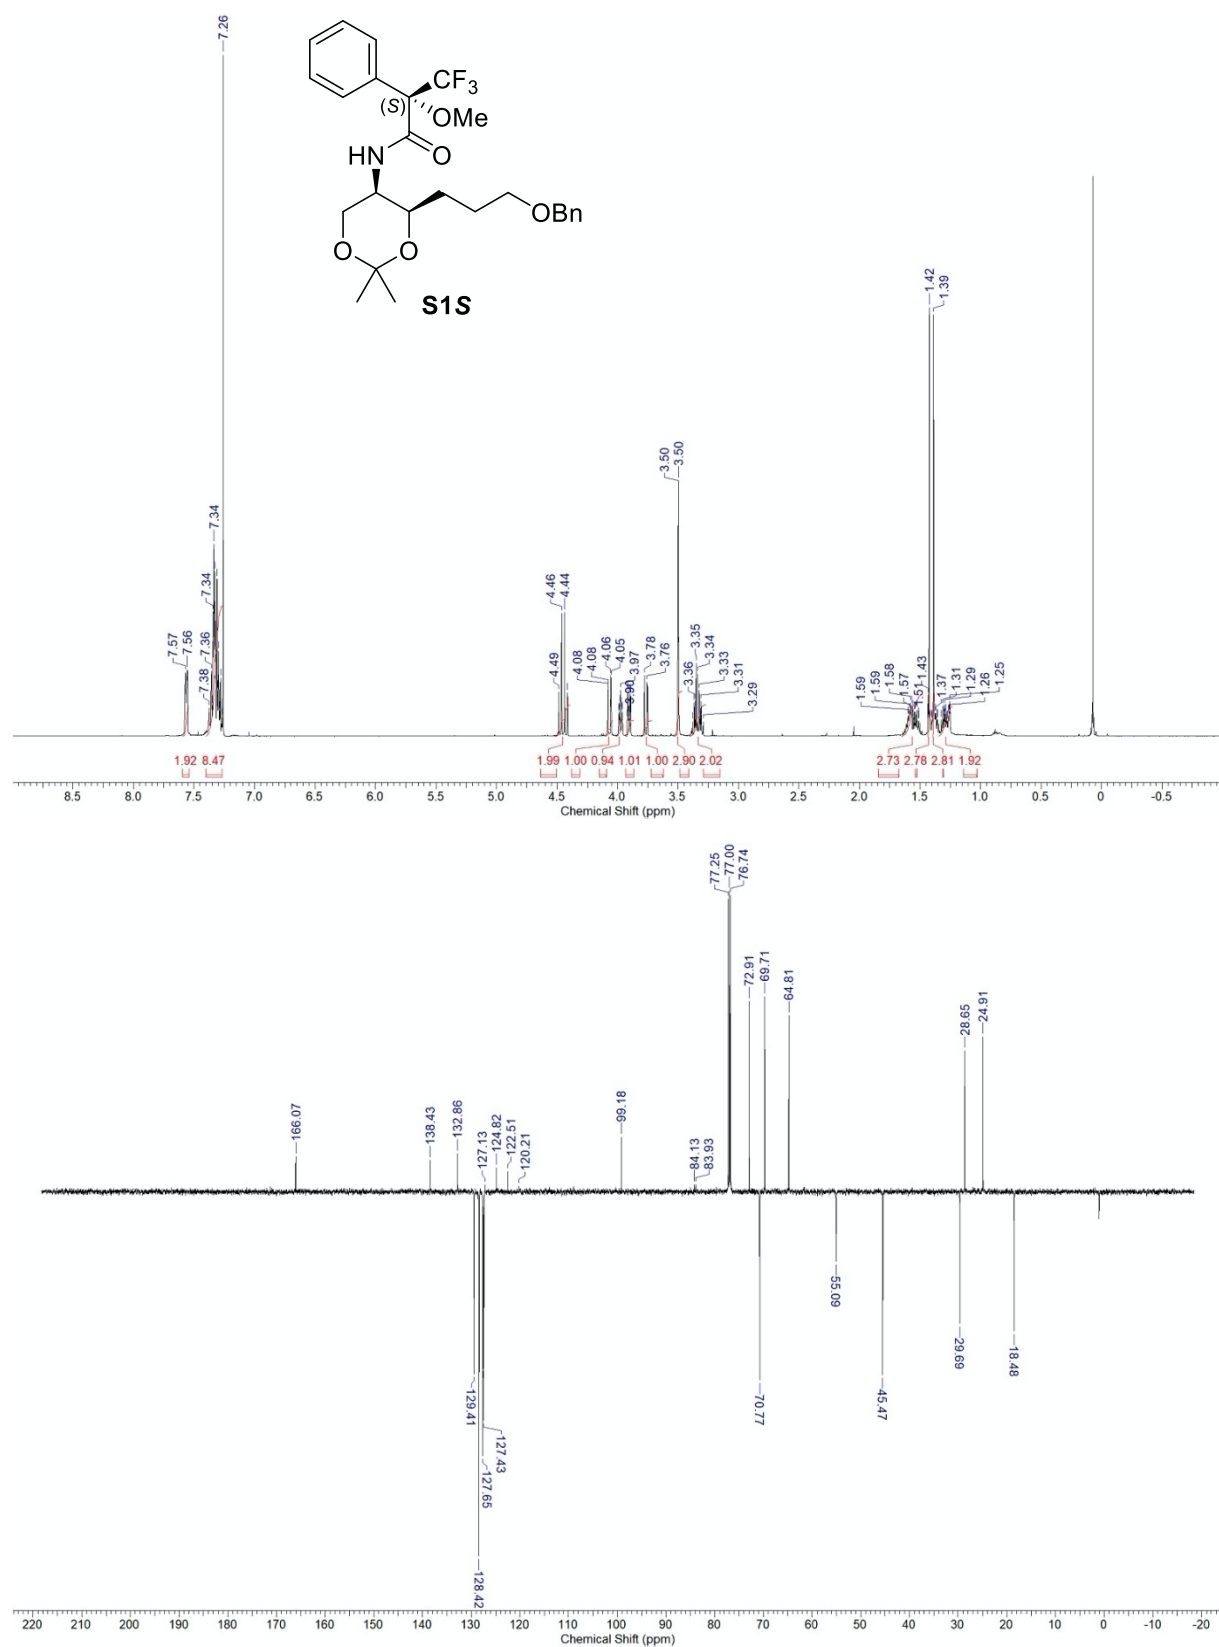

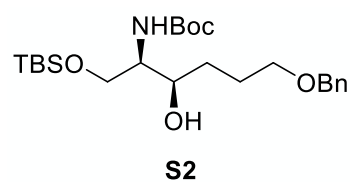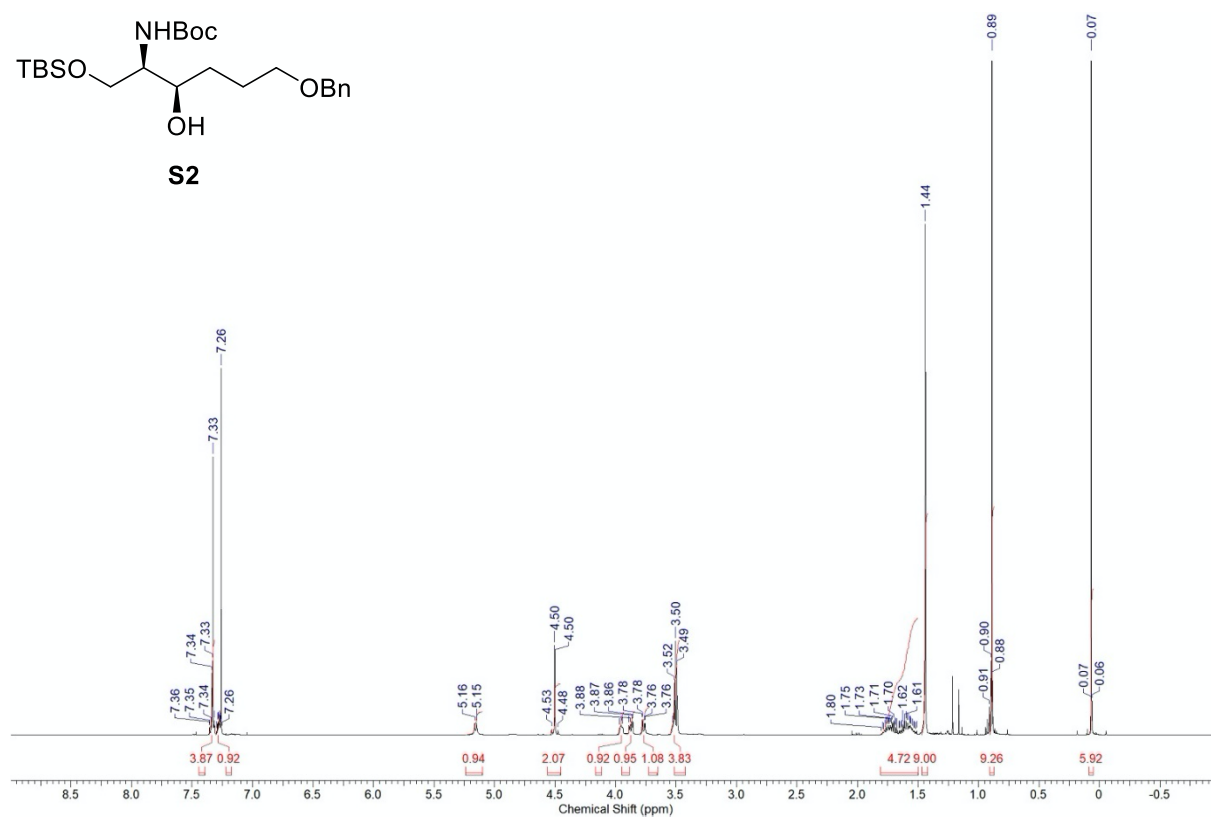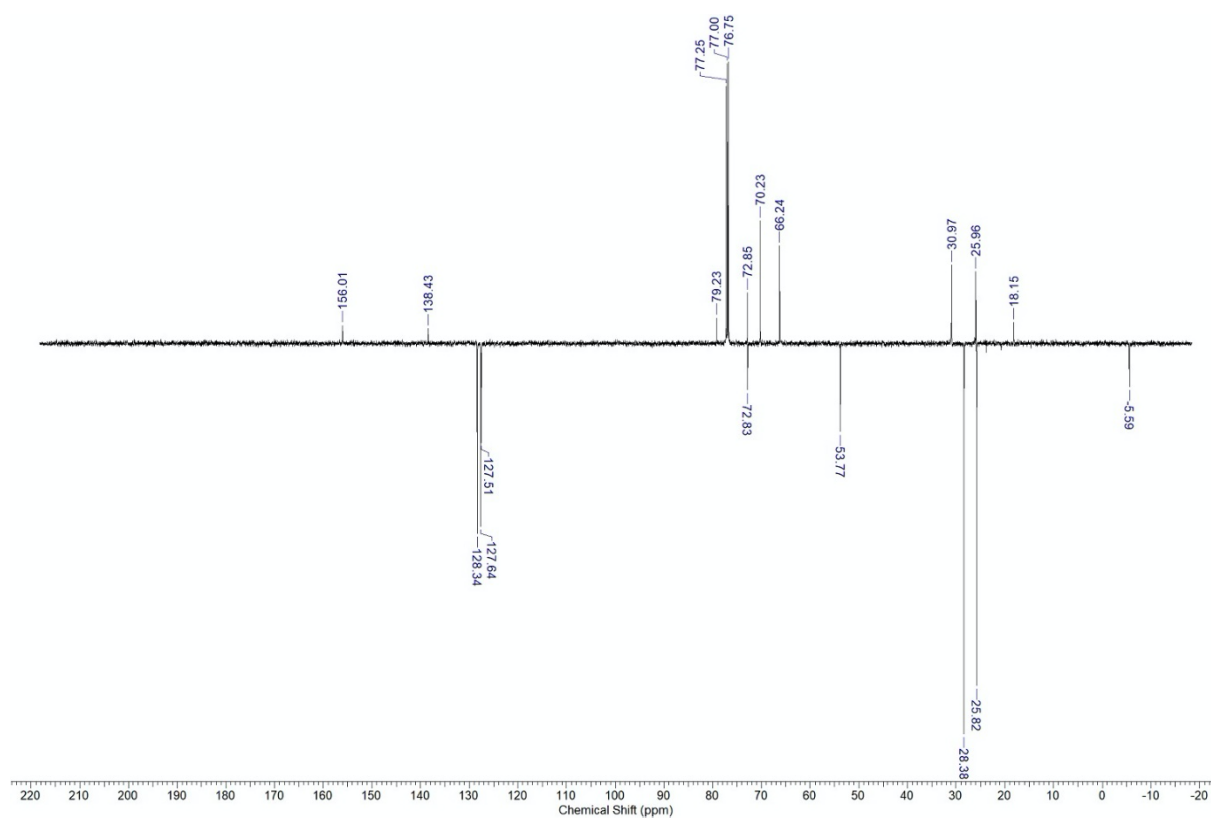

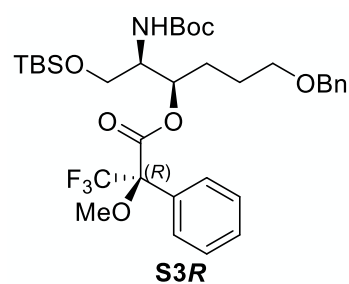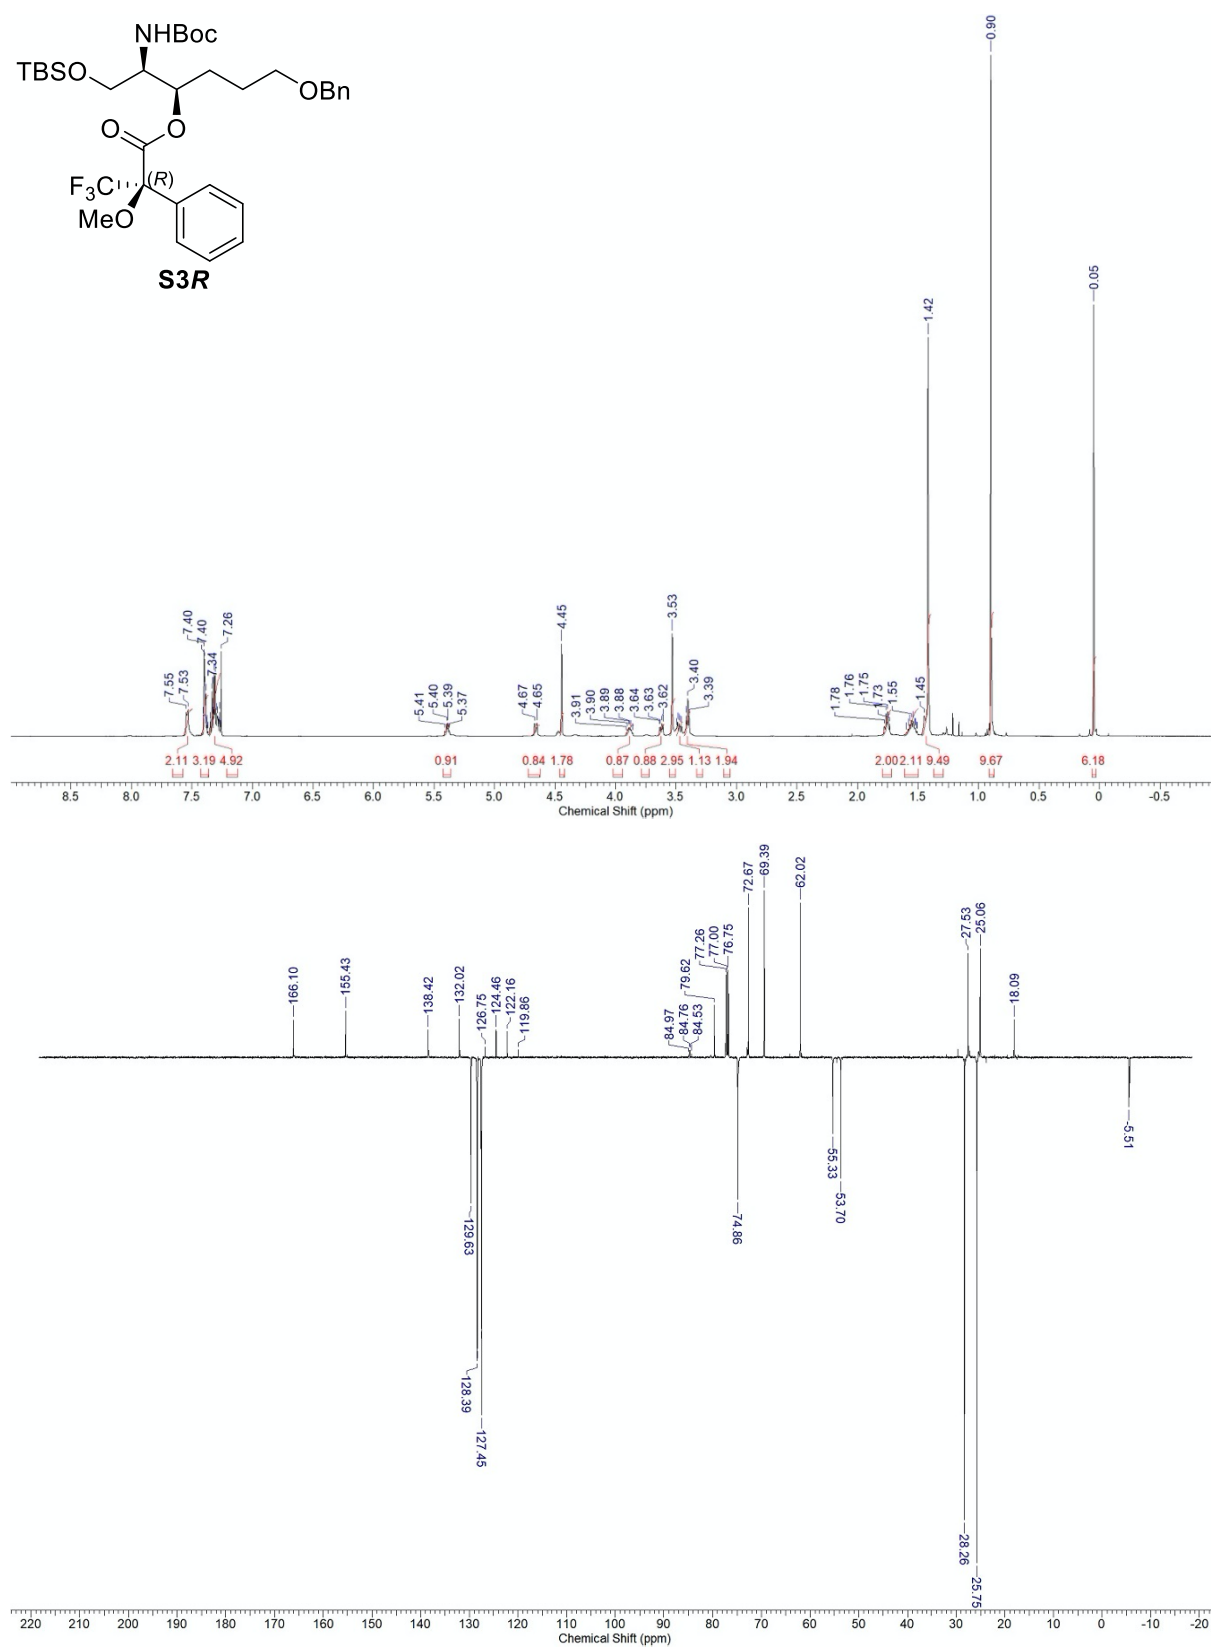

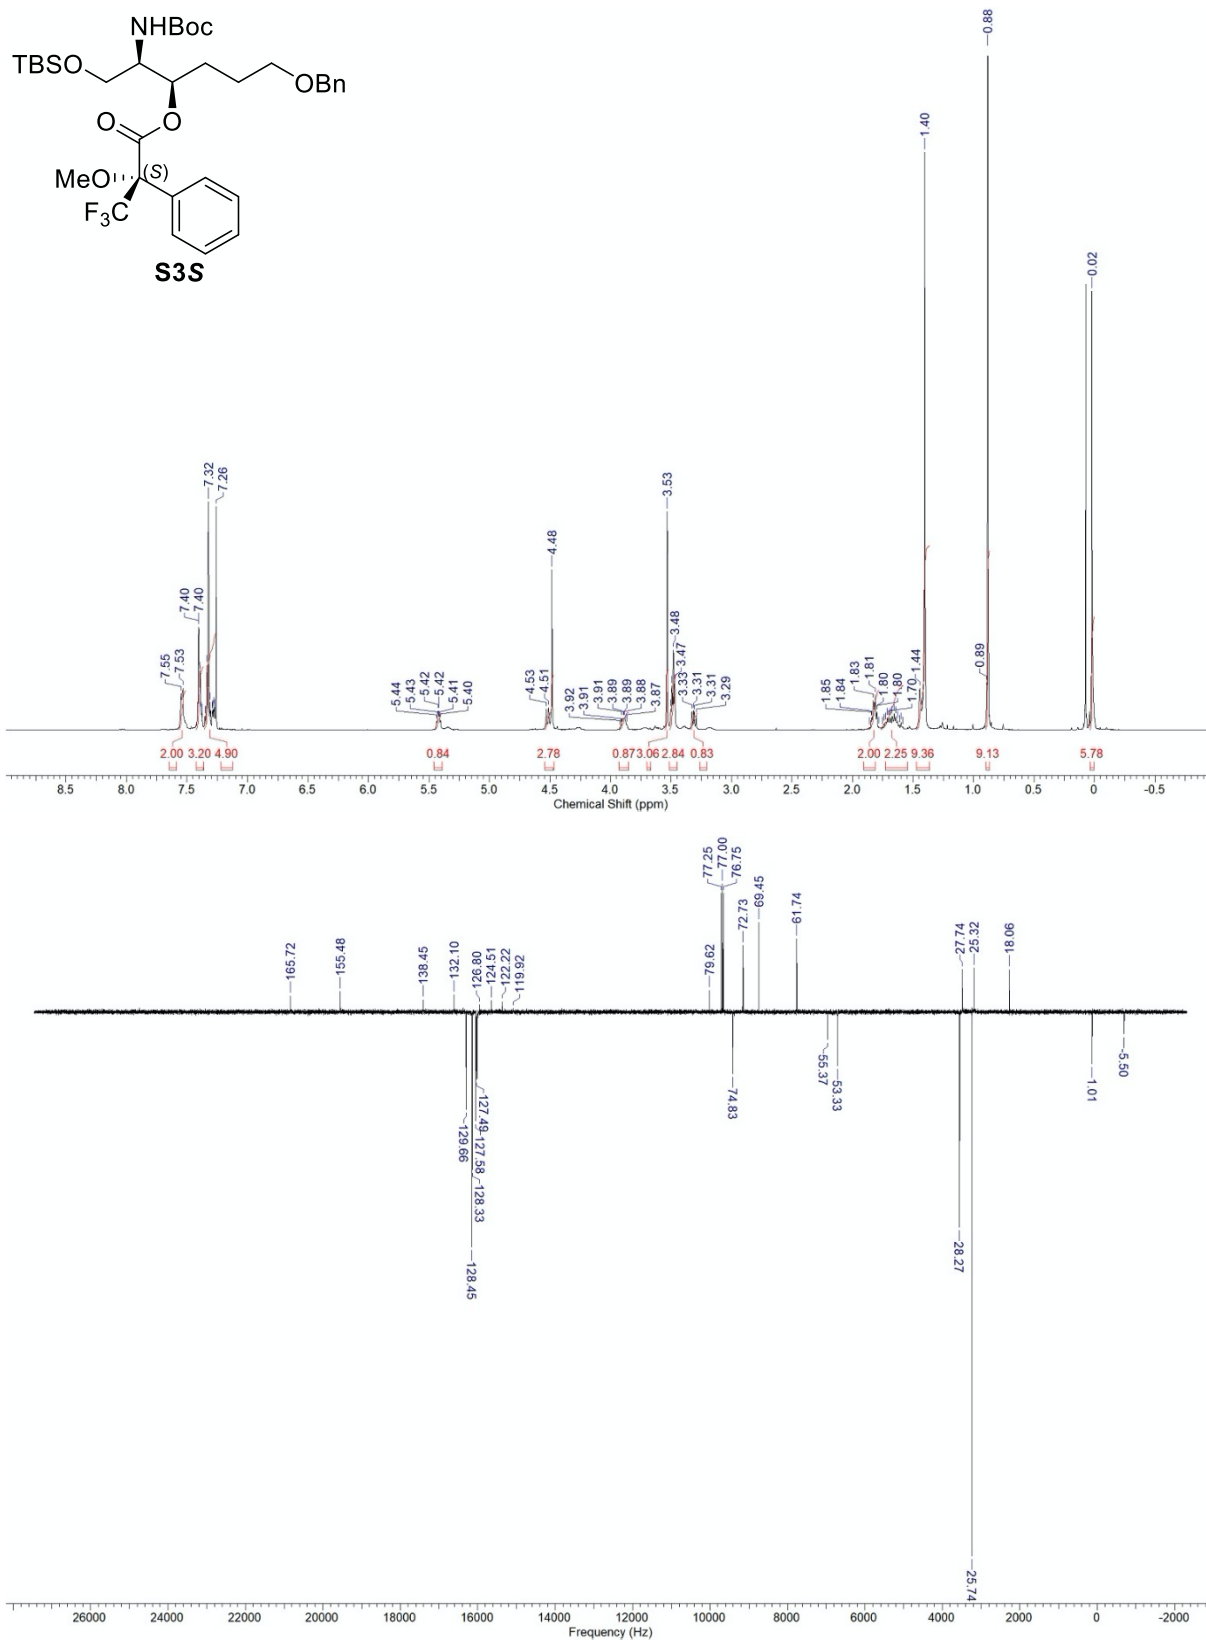

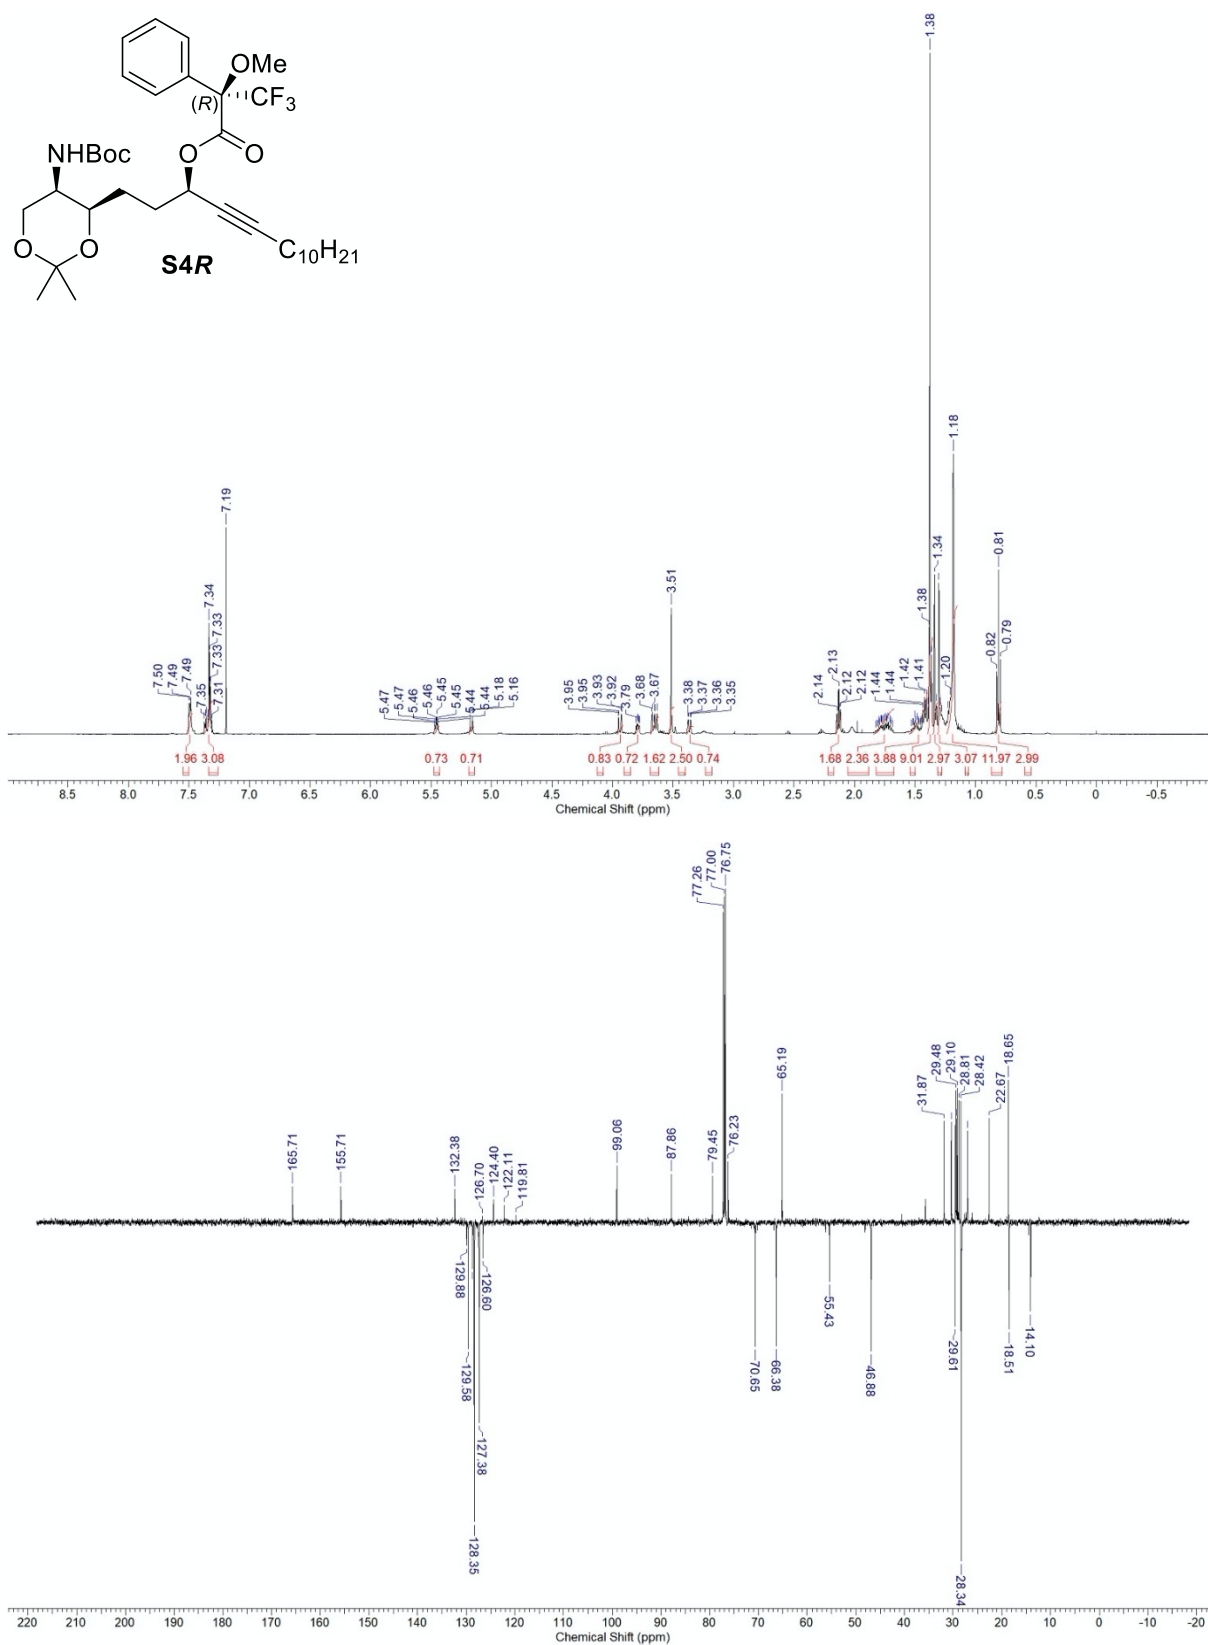

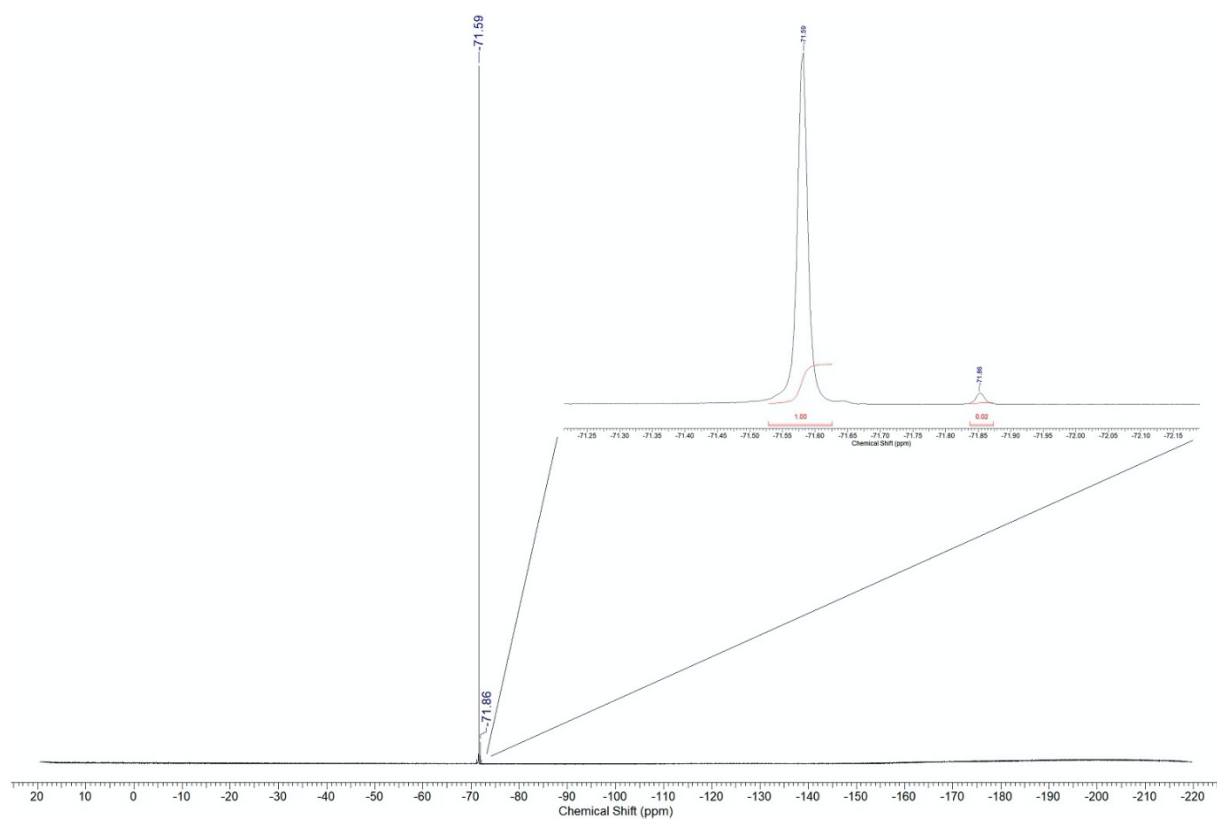

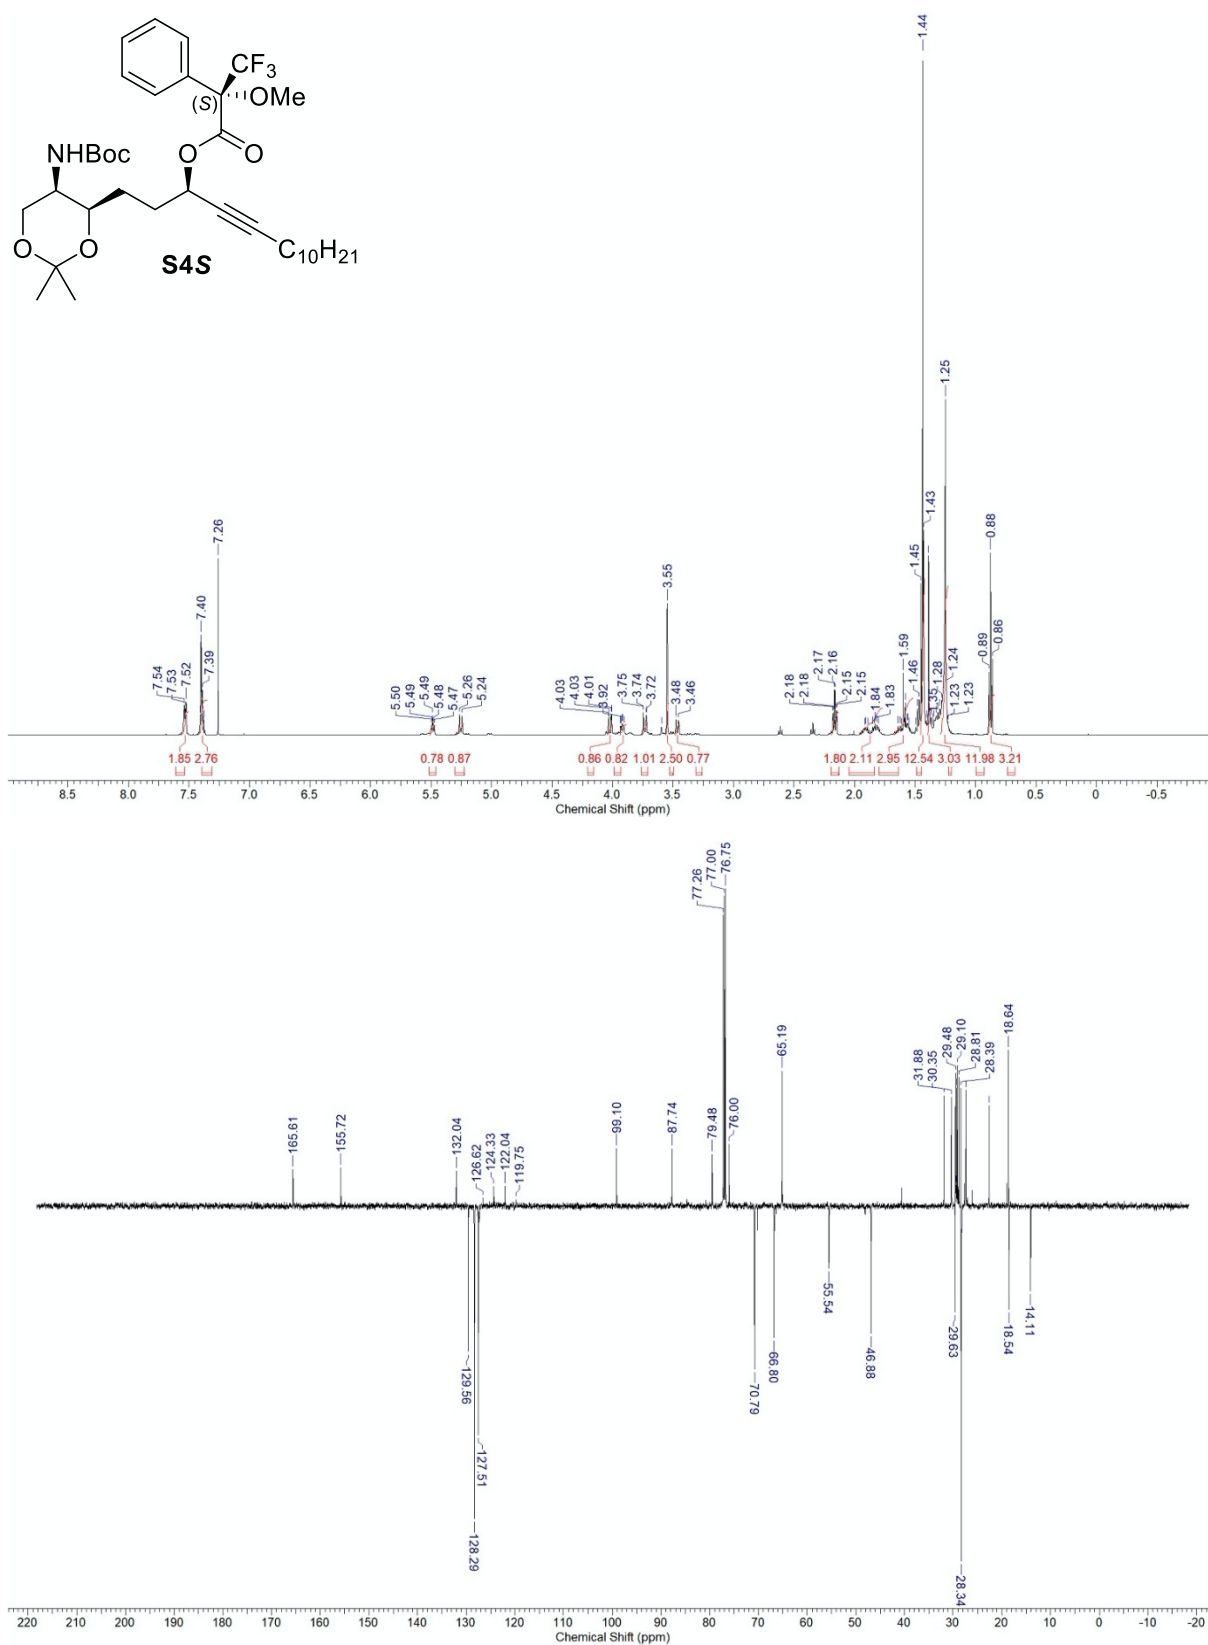



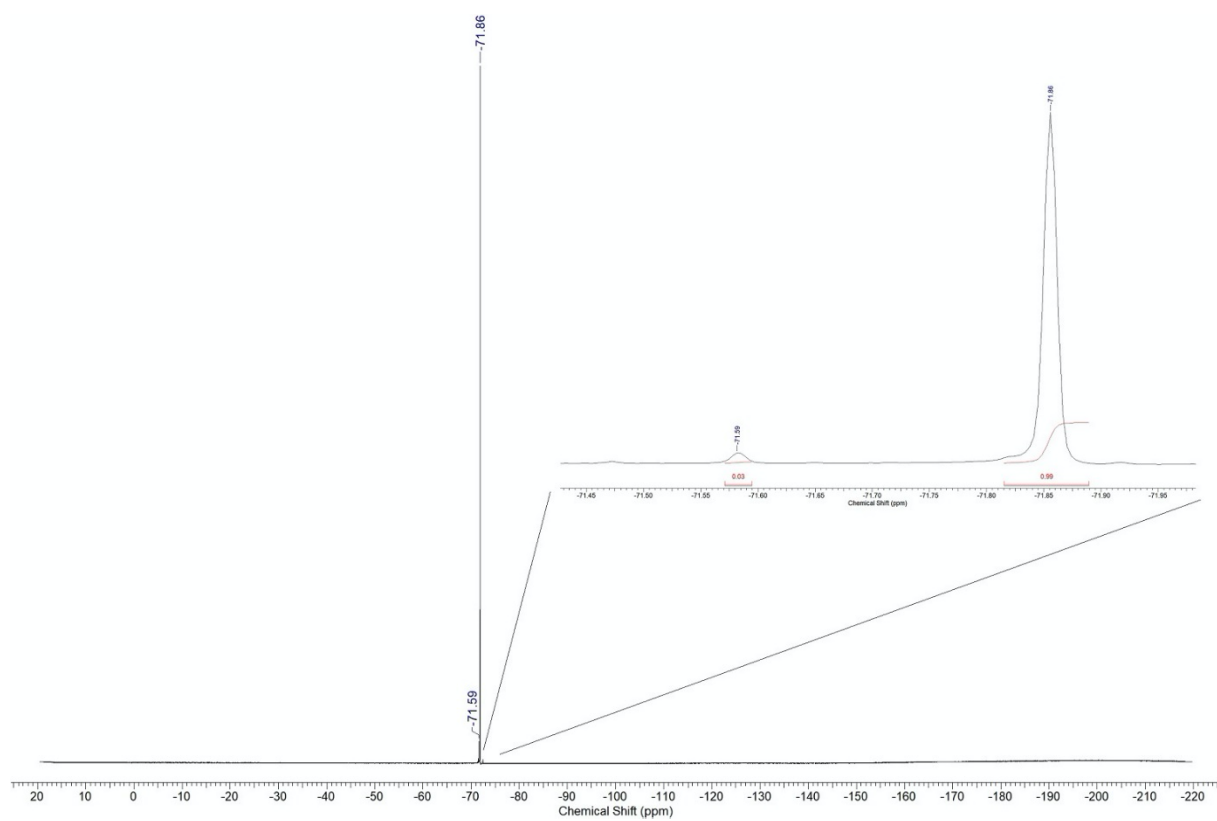

## Cell culture conditions and MTT-assay

### *Cell culture conditions and stock solutions*

The HCT-116<sup>wt</sup> (DSMZ ACC-581) as well as its knockout mutant HCT-116<sup>p53<sup>-/-</sup></sup> colon carcinoma cells, the 518A2 (Department of Radiotherapy & Radiobiology, University Hospital Vienna, Austria) melanoma cells, the U87 glioblastoma cells, the HeLa (DSMZ ACC-57) cervix carcinoma cells and the Ea.Hy926 (ATCC CRL-2922) endothelial cells were cultivated in Dulbeccos Modified Eagle Medium (Gibco, ThermoFisher), supplemented with 10% fetal bovine serum (Biochrom) and 1% Antibiotic-Antimycotic (Gibco, ThermoFisher) at 37 °C, 95% humidity and 5% CO<sub>2</sub>. If not indicated otherwise all incubation steps of the assay were conducted under these cell culture conditions. Halisphingosine A (**1**) was dissolved in DMSO (10 mM) and freshly diluted appropriately with sterile Milli-Q water.

### *Anti-proliferative activity (MTT-assay)<sup>5</sup>*

**1** was investigated for its anti-proliferative effect on various human carcinoma cell lines via the MTT (3-(4,5-dimethylthiazol-2-yl)-2,5-diphenyltetrazolium bromide, Glentham life sciences) based proliferation assay. Cells were seeded at  $0.05 \times 10^6$  cells per mL (cpm) into the wells of 96-well microtiter plates (100 µL/well) and incubated for 24 h. Appropriate dilutions in H<sub>2</sub>O of halisphingosine A (**1**) or equal amounts of the solvent were added into the wells (final concentrations 100 µM–5 nM) and the cells were further incubated for 72 h. Before staining of the viable cells the plates were centrifuged (300 g, 5 min, 4 °C) and the back medium was discarded. 50 µL of a 0.05% MTT solution (PBS) were added to each well. After another 2 h of incubation the plates were centrifuged as before and the MTT solution was discarded again. To dissolve the cells and the formed violet water-insoluble formazan, 25 µL of an SDS/DMSO solution (10%, 0.6% AcOH) were added to each well and the plates were further incubated for at least 1 h. The absorbances at 570 nm (formazan) and at 630 nm (background) were measured. The absorbance of formazan is directly linked to the amount of metabolically active (viable) cells in the wells. The absorbance of the wells treated with the solvent was set to 100% viable cells, and the percentage of viable cells in the wells treated with halisphingosine A was calculated accordingly. IC<sub>50</sub> values were determined using Graphpad Prism, means and SD were calculated from four independent experiments.

## References

- (1) T. A. Mansoor, T. Park, X. Luo, J. Hong, C.-O. Lee, J. H. Jung, *Nat. Prod. Sci.*, 2007, **13**, 247-250.
- (2) T. F. Molinski, R Biegelmeyer, E. P. Stout, X. Wang, M. L. C. Frota Jr., A. T. Henriques, *J. Nat. Prod.*, 2013, **76**, 374-381.
- (3) J. A. Dale, D. L. Dull, H. S. Mosher, *Org. Chem.*, 1969, **34**, 2543-2549.
- (4) I. Ohtani, T. Kusumi, M. O. Ishitsuka, H. Kakisawa, *Tetrahedron Lett.*, 1989, **30**, 3147-3150.
- (5) T. Mosmann, *J. Immunol. Methods*, 1983, **65**, 55-63
